# Supplementary material for: Hypoxia Adaptations in the Grey Wolf (Canis lupus chanco) from Qinghai-Tibet Plateau
Source: PLoS Genet. 2014 Jul 31;10(7):e1004466. doi: 10.1371/journal.pgen.1004466 (PMC4117439; doi:10.1371/journal.pgen.1004466)
Supplement: Table S1 — Samples in this study. (DOC) [file pgen.1004466.s004.doc]

Table S1: Samples in this study.

| Group | Code | Locale of Origin in China | Source | Birth Status |
| --- | --- | --- | --- | --- |
| Lowland | IM01 | Inner Mongolia | Haerbing Zoo | wild born |
| IM02 | Inner Mongolia | Haerbing Zoo | captive born |
| IM03 | Inner Mongolia | Haerbing Zoo | wild born |
| IM04 | Inner Mongolia | Haerbing Zoo | captive born |
| IM05 | Inner Mongolia | Haerbing Zoo | captive born |
| IM06* | Inner Mongolia | Haerbing Zoo | wild born |
| IM07* | Inner Mongolia | Haerbing Zoo | wild born |
| XJ21 | Xinjiang | Kalamaili Nature Reserve | wild born |
| XJ22 | Xinjiang | Kalamaili Nature Reserve | wild born |
| XJ23 | Xinjiang | Kalamaili Nature Reserve | wild born |
| XJ24* | Xinjiang | Kalamaili Nature Reserve | wild born |
| XJ25 | Xinjiang | Kalamaili Nature Reserve | wild born |
| XJ26 | Xinjiang | Kalamaili Nature Reserve | captive born |
| XJ27 | Xinjiang | Kalamaili Nature Reserve | wild born |
| XJ28 | Xinjiang | Kalamaili Nature Reserve | wild born |
| XJ29 | Xinjiang | Duzhishan Garden | wild born |
| XJ30* | Xinjiang | Duzhishan Garden | wild born |
| XJ31 | Xinjiang | Kuitun Garden | wild born |
| XJ33 | Xinjiang | Kashi Garden | wild born |
| XJ34 | Xinjiang | Kashi Garden | wild born |
| XJ35 | Xinjiang | Kashi Garden | wild born |
| Highland | TI08 | Tibet | Luobulingka Zoo | wild born |
| TI09* | Tibet | Luobulingka Zoo | wild born |
| TI10 | Tibet | Luobulingka Zoo | wild born |
| TI32* | Tibet | Kashi Garden | wild born |
| QH11* | Qinghai | Xining Zoo | wild born |
| QH12 | Qinghai | Xining Zoo | wild born |
| QH13 | Qinghai | Xining Zoo | wild born |
| QH14 | Qinghai | Xining Zoo | wild born |
| QH15 | Qinghai | Xining Zoo | captive born |
| QH16* | Qinghai | Xining Zoo | wild born |
| QH17 | Qinghai | Xining Zoo | wild born |
| QH18 | Qinghai | Xining Zoo | wild born |
| QH19 | Qinghai | Xining Zoo | wild born |
| QH20 | Qinghai | Xining Zoo | wild born |

* denoted these samples for genome sequencing.
