# Supplementary material for: Hypoxia Adaptations in the Grey Wolf (Canis lupus chanco) from Qinghai-Tibet Plateau
Source: PLoS Genet. 2014 Jul 31;10(7):e1004466. doi: 10.1371/journal.pgen.1004466 (PMC4117439; doi:10.1371/journal.pgen.1004466)
Supplement: Table S6 — GO analysis of the 1548 genes identified with FST and Δπ. (XLS) [file pgen.1004466.s009.xls]

## Sheet: Sheet2
P-value	Total genes in category	Total genes in input	Input genes in category	Category	Type	Term name	Gene
7.5e-30	11353	1100	695	GO:0003674	MF	molecular_function	ABR,ACACA,TADA2A,ACSL6,IL3_CANFA,CSF2,RAB4A,ADAMTSL3,REV1,EIF5B,LYG1,LYG2,LIPT1,AK7,PAPOLA,AKAP7,ALDH1A1,ALK,APBB2,RAP1B,ARAP2,ARNTL,PTH,FAR1,ATP2B2,ATP6V1C2,AZIN1,ATP6V1C1,P2RY2,ZFPM2,FZD6,LOC100684449,RIMS2,BATF,FLVCR2,TTLL5,BCL11A,LOC612537,ZUFSP,KPNA5,GPRC6A,RFX6,T,RPS6KA2,BTRC,POLL,RFX4,C7ORF10,PDE10A,AMACR,RXFP3,ADAMTS12,SLC20A2,VDAC3,CAD,SLC30A3,TRIM54,EIF2B4,SNX17,ZNF513,PPM1G,CAPSL,IL7R,…
1.17e-26	8251	1100	541	GO:0008150	BP	biological_process	ABR,ACACA,IL3_CANFA,CSF2,RAB4A,REV1,TXNDC9,LYG1,LYG2,MITD1,LIPT1,TSGA10,PAPOLA,AKAP7,ALK,APBB2,RAP1B,ARAP2,ARHGAP19,ARNTL,PTH,ATP2B2,ATP6V1C2,AZIN1,ATP6V1C1,ZFPM2,OXR1,FZD6,LOC100684449,SLC25A32,RIMS2,FLVCR2,TTLL5,RSPH4A,KPNA5,GPRC6A,RFX6,BICD1,T,RPS6KA2,BTRC,POLL,DPCD,FBXW4,RFX4,PDE10A,ADAMTS12,SLC20A2,CAD,SLC30A3,TRIM54,EIF2B4,SNX17,ZNF513,PPM1G,CAND1,IL7R,SPEF2,PNPT1,FGD5,NR2C2,TRH,PPIAP4,CD27…
4.83e-23	6957	1100	465	GO:0009987	BP	cellular process	ABR,ACACA,IL3_CANFA,CSF2,RAB4A,REV1,TXNDC9,LYG1,LYG2,MITD1,LIPT1,TSGA10,PAPOLA,AKAP7,ALK,APBB2,RAP1B,ARAP2,ARHGAP19,ARNTL,PTH,ATP2B2,ATP6V1C2,AZIN1,ATP6V1C1,ZFPM2,OXR1,FZD6,LOC100684449,SLC25A32,RIMS2,FLVCR2,TTLL5,RSPH4A,KPNA5,GPRC6A,RFX6,T,RPS6KA2,BTRC,POLL,DPCD,FBXW4,RFX4,PDE10A,CAD,SLC30A3,TRIM54,EIF2B4,SNX17,PPM1G,CAND1,IL7R,SPEF2,PNPT1,FGD5,NR2C2,TRH,PPIAP4,CD274,CDH23,PSAP,TUFT1,RIIAD1,CLST…
2e-20	7412	1100	478	GO:0005488	MF	binding	ABR,ACACA,TADA2A,IL3_CANFA,CSF2,RAB4A,ADAMTSL3,REV1,EIF5B,AK7,PAPOLA,ALK,APBB2,RAP1B,ARAP2,ARNTL,PTH,ATP2B2,ZFPM2,FZD6,LOC100684449,RIMS2,BATF,FLVCR2,BCL11A,ZUFSP,RFX6,T,RPS6KA2,BTRC,POLL,RFX4,PDE10A,ADAMTS12,CAD,TRIM54,EIF2B4,SNX17,ZNF513,PPM1G,CAPSL,SPEF2,PNPT1,FGD5,NR2C2,ZFYVE20,TRH,RLN1,CDH23,TUFT1,LOC100856524,CLSTN1,CTNNBIP1,LOC100855658,KIF1B,LOC489647,GAS8,GFPT2,MAPK9,HBP1,PRKAR2B,H2AFY2,…
3.33e-20	9566	1100	580	GO:0005575	CC	cellular_component	ABR,ACACA,TADA2A,IL3_CANFA,CSF2,RAB4A,ADAMTSL3,MITD1,LIPT1,PAPOLA,AKAP7,ALK,ANO2,APBB2,RAP1B,ARAP2,ARHGAP19,ARNTL,BTBD10,PTH,ATP2B2,ATP6V1C2,ATP6V1C1,P2RY2,ZFPM2,BAALC,FZD6,LOC100684449,SLC25A32,DCAF13,BATF,FLVCR2,C8H14ORF1,RSPH4A,KPNA5,GPRC6A,BICD1,T,RPS6KA2,BTRC,RFX4,C7ORF10,C1QTNF3,RXFP3,ADAMTS12,SLC20A2,VDAC3,SLC30A3,TRIM54,MPV17,EIF2B4,SNX17,ZNF513,CAND1,IL7R,SPEF2,FGD5,NR2C2,ZFYVE20,TRH,CCD…
4.97e-18	5848	1100	390	KEGG:00000	ke	KEGG pathways	ACACA,ACSL6,IL3_CANFA,CSF2,RAB4A,REV1,EIF5B,LOC100684768,MRPL30,LIPT1,AK7,PAPOLA,ALDH1A1,RAP1B,ARAP2,ARNTL,FAR1,ATP2B2,ATP6V1C2,ATP6V1C1,P2RY2,FZD6,LOC612537,RPS6KA2,BTRC,POLL,PDE10A,AMACR,VDAC3,CACNA2D3,CAD,DNAJC5G,MPV17,EIF2B4,IL7R,ZFYVE20,CD274,PSAP,CGN,NMNAT1,UBE4B,LOC489647,CNOT6,MAPK9,CNTN1,CNTNAP2,PRKAR2B,COL13A1,H2AFY2,SAR1A,PPA1,NPFFR1,NODAL,RPL8,CNGA1,CTH,CX3CR1,CCR8,RPSA,CXCL14,C8B,C8A…
5.69e-17	5234	1100	355	GO:0044699	BP	single-organism process	ABR,ACACA,IL3_CANFA,CSF2,RAB4A,REV1,TXNDC9,LYG1,LYG2,MITD1,TSGA10,ALK,APBB2,RAP1B,ARAP2,ARHGAP19,PTH,ATP2B2,ATP6V1C2,ATP6V1C1,ZFPM2,OXR1,FZD6,LOC100684449,SLC25A32,RIMS2,FLVCR2,RSPH4A,KPNA5,GPRC6A,T,RPS6KA2,BTRC,POLL,DPCD,FBXW4,RFX4,PDE10A,SLC20A2,SLC30A3,TRIM54,EIF2B4,SNX17,ZNF513,CAND1,IL7R,FGD5,NR2C2,TRH,CD274,CDH23,PSAP,TUFT1,RIIAD1,CLSTN1,CTNNBIP1,KIF1B,LOC489647,GAS8,RASGEF1C,CNTN5,CNTNAP2,…
8.47e-16	4688	1100	322	GO:0044763	BP	single-organism cellular process	ABR,IL3_CANFA,CSF2,RAB4A,REV1,TXNDC9,LYG1,LYG2,MITD1,TSGA10,ALK,APBB2,RAP1B,ARAP2,ARHGAP19,PTH,ATP2B2,ATP6V1C2,ATP6V1C1,ZFPM2,OXR1,FZD6,LOC100684449,SLC25A32,RIMS2,FLVCR2,RSPH4A,KPNA5,GPRC6A,T,RPS6KA2,BTRC,POLL,DPCD,PDE10A,SLC30A3,TRIM54,EIF2B4,SNX17,CAND1,IL7R,FGD5,NR2C2,TRH,CD274,CDH23,PSAP,TUFT1,RIIAD1,CLSTN1,CTNNBIP1,KIF1B,LOC489647,GAS8,RASGEF1C,CNTNAP2,COG5,PRKAR2B,H2AFY2,AIFM2,SAR1A,EIF4EB…
2.76e-14	4382	1100	300	GO:0043167	MF	ion binding	ABR,ACACA,TADA2A,RAB4A,ADAMTSL3,REV1,EIF5B,AK7,ALK,RAP1B,ARAP2,ATP2B2,ZFPM2,RIMS2,BCL11A,ZUFSP,RPS6KA2,PDE10A,ADAMTS12,CAD,TRIM54,SNX17,ZNF513,PPM1G,CAPSL,SPEF2,FGD5,NR2C2,ZFYVE20,CDH23,TUFT1,CLSTN1,KIF1B,LOC489647,MAPK9,AIFM2,SAR1A,PPA1,AGXT2L2,ZNF7,ZNF517,ZNF250,ZNF34,NFXL1,CNGA1,CREG2,RNF149,CRISPLD2,CTH,MOBP,ZFYVE1,DCHS2,POLR3A,DTNB,EFCAB10,Q6QT04_CANFA,EHMT1,ZMYND19,NEURL1B,CHUK,PKD2L1,SCD,H…
2.16e-13	3716	1100	261	GO:0050789	BP	regulation of biological process	ABR,IL3_CANFA,CSF2,RAB4A,TXNDC9,ALK,APBB2,RAP1B,ARAP2,ARHGAP19,PTH,ATP2B2,ZFPM2,FZD6,LOC100684449,RIMS2,GPRC6A,RFX6,T,RPS6KA2,BTRC,FBXW4,RFX4,PDE10A,SLC30A3,TRIM54,SNX17,CAND1,IL7R,FGD5,NR2C2,TRH,CD274,PSAP,TUFT1,RIIAD1,CTNNBIP1,CNOT6,RASGEF1C,PRKAR2B,H2AFY2,AIFM2,SAR1A,EIF4EBP2,NODAL,ZNF7,ZNF517,ZNF250,ZNF34,USP10,CTH,ANKRD13C,LECT2,C8A,DCDC2C,DLG5,DNMT3A,DOCK8,EFCAB10,Q6QT04_CANFA,EHMT1,CHUK,WN…
1.14e-12	3956	1100	271	GO:0065007	BP	biological regulation	ABR,ACACA,IL3_CANFA,CSF2,RAB4A,TXNDC9,ALK,APBB2,RAP1B,ARAP2,ARHGAP19,PTH,ATP2B2,ZFPM2,FZD6,LOC100684449,RIMS2,GPRC6A,RFX6,T,RPS6KA2,BTRC,FBXW4,RFX4,PDE10A,SLC30A3,TRIM54,EIF2B4,SNX17,CAND1,IL7R,FGD5,NR2C2,TRH,CD274,PSAP,TUFT1,RIIAD1,CTNNBIP1,CNOT6,RASGEF1C,PRKAR2B,H2AFY2,AIFM2,SAR1A,EIF4EBP2,NODAL,ZNF7,ZNF517,ZNF250,ZNF34,USP10,CTH,ANKRD13C,CX3CR1,CCR8,LECT2,C8A,DCDC2C,DLG5,DNMT3A,DOCK8,E2R8D3_CA…
2.11e-12	7575	1100	452	GO:0005623	CC	cell	ABR,ACACA,TADA2A,RAB4A,MITD1,LIPT1,PAPOLA,AKAP7,APBB2,RAP1B,ARAP2,ARHGAP19,ARNTL,BTBD10,ATP2B2,ZFPM2,BAALC,FZD6,LOC100684449,SLC25A32,DCAF13,BATF,RSPH4A,KPNA5,GPRC6A,BICD1,T,RPS6KA2,BTRC,RFX4,C7ORF10,VDAC3,SLC30A3,TRIM54,EIF2B4,SNX17,ZNF513,CAND1,IL7R,SPEF2,FGD5,NR2C2,ZFYVE20,CCDC90B,CD274,CDH23,PSAP,CGN,TUFT1,CTNNBIP1,UBE4B,KIF1B,LOC489647,GAS8,DBNDD1,GFPT2,RASGEF1C,CNTN5,COG5,PRKAR2B,H2AFY2,AIF…
2.11e-12	7575	1100	452	GO:0044464	CC	cell part	ABR,ACACA,TADA2A,RAB4A,MITD1,LIPT1,PAPOLA,AKAP7,APBB2,RAP1B,ARAP2,ARHGAP19,ARNTL,BTBD10,ATP2B2,ZFPM2,BAALC,FZD6,LOC100684449,SLC25A32,DCAF13,BATF,RSPH4A,KPNA5,GPRC6A,BICD1,T,RPS6KA2,BTRC,RFX4,C7ORF10,VDAC3,SLC30A3,TRIM54,EIF2B4,SNX17,ZNF513,CAND1,IL7R,SPEF2,FGD5,NR2C2,ZFYVE20,CCDC90B,CD274,CDH23,PSAP,CGN,TUFT1,CTNNBIP1,UBE4B,KIF1B,LOC489647,GAS8,DBNDD1,GFPT2,RASGEF1C,CNTN5,COG5,PRKAR2B,H2AFY2,AIF…
2.19e-12	3529	1100	247	GO:0050794	BP	regulation of cellular process	ABR,IL3_CANFA,CSF2,RAB4A,TXNDC9,ALK,APBB2,RAP1B,ARAP2,ARHGAP19,PTH,ATP2B2,ZFPM2,FZD6,LOC100684449,RIMS2,GPRC6A,RFX6,T,RPS6KA2,BTRC,FBXW4,RFX4,PDE10A,SLC30A3,TRIM54,SNX17,IL7R,FGD5,NR2C2,TRH,CD274,PSAP,TUFT1,RIIAD1,CTNNBIP1,CNOT6,RASGEF1C,PRKAR2B,AIFM2,SAR1A,EIF4EBP2,NODAL,ZNF7,ZNF517,ZNF250,ZNF34,USP10,CTH,ANKRD13C,LECT2,DCDC2C,DLG5,DOCK8,EFCAB10,Q6QT04_CANFA,EHMT1,CHUK,WNT8B,HIF1AN,TASP1,ARNT2,S…
5.39e-12	2683	1100	199	GO:0043169	MF	cation binding	ACACA,TADA2A,ADAMTSL3,REV1,ARAP2,ATP2B2,ZFPM2,RIMS2,BCL11A,ZUFSP,RPS6KA2,PDE10A,ADAMTS12,CAD,TRIM54,ZNF513,PPM1G,CAPSL,FGD5,NR2C2,ZFYVE20,CDH23,CLSTN1,LOC489647,PPA1,ZNF7,ZNF517,ZNF250,ZNF34,NFXL1,RNF149,MOBP,ZFYVE1,DCHS2,POLR3A,DTNB,EFCAB10,EHMT1,ZMYND19,NEURL1B,PKD2L1,SCD,HIF1AN,LAP3,DDX41,PDLIM7,CAPN9,FBN2,ARAP1,PDE2A,FSTL4,FSTL5,GDA,ABP1,GLI3,GNAQ,NCALD,GRIN3A,PPP3R2,NUFIP1,HACL1,PARP12,TBXAS…
1.39e-11	4636	1100	302	GO:0071704	BP	organic substance metabolic process	ACACA,IL3_CANFA,CSF2,REV1,LYG1,LYG2,LIPT1,PAPOLA,AKAP7,ALK,APBB2,ARAP2,ARNTL,PTH,ATP2B2,AZIN1,ZFPM2,OXR1,FZD6,TTLL5,RFX6,T,RPS6KA2,BTRC,POLL,RFX4,ADAMTS12,CAD,PPM1G,CAND1,IL7R,SPEF2,PNPT1,NR2C2,PPIAP4,PSAP,CTNNBIP1,NMNAT1,UBE4B,GFPT2,PRKAR2B,H2AFY2,AIFM2,SAR1A,EIF4EBP2,NODAL,ZNF7,ZNF517,ZNF250,RPL8,ZNF34,CORIN,USP10,CTH,ANKRD13C,LOC485601,RPSA,C8A,DBT,CCDC76,POLR3A,DNMT3A,EFCAB10,EHMT1,ERLIN1,SCD…
2.23e-11	2652	1100	195	GO:0046872	MF	metal ion binding	ACACA,TADA2A,ADAMTSL3,REV1,ARAP2,ATP2B2,ZFPM2,RIMS2,BCL11A,ZUFSP,RPS6KA2,PDE10A,ADAMTS12,CAD,TRIM54,ZNF513,PPM1G,CAPSL,FGD5,NR2C2,ZFYVE20,CDH23,CLSTN1,LOC489647,PPA1,ZNF7,ZNF517,ZNF250,ZNF34,NFXL1,RNF149,MOBP,ZFYVE1,DCHS2,POLR3A,DTNB,EFCAB10,EHMT1,ZMYND19,NEURL1B,PKD2L1,SCD,HIF1AN,LAP3,DDX41,PDLIM7,CAPN9,FBN2,ARAP1,PDE2A,FSTL4,FSTL5,GDA,ABP1,GLI3,GNAQ,NCALD,PPP3R2,NUFIP1,HACL1,PARP12,TBXAS1,KAT6B…
4.51e-11	6352	1100	386	GO:0005622	CC	intracellular	ABR,ACACA,TADA2A,RAB4A,MITD1,LIPT1,PAPOLA,AKAP7,APBB2,RAP1B,ARAP2,ARHGAP19,ARNTL,BTBD10,ATP2B2,ZFPM2,BAALC,FZD6,LOC100684449,SLC25A32,DCAF13,BATF,RSPH4A,KPNA5,BICD1,T,RPS6KA2,BTRC,RFX4,C7ORF10,VDAC3,SLC30A3,TRIM54,EIF2B4,SNX17,ZNF513,CAND1,SPEF2,FGD5,NR2C2,ZFYVE20,CCDC90B,PSAP,CGN,TUFT1,CTNNBIP1,UBE4B,KIF1B,GAS8,DBNDD1,GFPT2,RASGEF1C,CNTN5,COG5,PRKAR2B,H2AFY2,AIFM2,SAR1A,PPA1,ZNF7,ZNF517,ZNF250,R…
4.77e-11	4858	1100	311	GO:0008152	BP	metabolic process	ACACA,IL3_CANFA,CSF2,REV1,LYG1,LYG2,LIPT1,PAPOLA,AKAP7,ALK,APBB2,ARAP2,ARNTL,PTH,ATP2B2,AZIN1,ZFPM2,OXR1,FZD6,TTLL5,RFX6,T,RPS6KA2,BTRC,POLL,RFX4,ADAMTS12,CAD,EIF2B4,PPM1G,CAND1,IL7R,SPEF2,PNPT1,NR2C2,PPIAP4,PSAP,CTNNBIP1,NMNAT1,UBE4B,GFPT2,PRKAR2B,H2AFY2,AIFM2,SAR1A,PPA1,EIF4EBP2,NODAL,ZNF7,ZNF517,ZNF250,RPL8,ZNF34,CORIN,USP10,CTH,ANKRD13C,LOC485601,RPSA,C8A,DBT,CCDC76,POLR3A,DNMT3A,EFCAB10,EHMT…
9.78e-11	4438	1100	288	GO:0044238	BP	primary metabolic process	ACACA,IL3_CANFA,CSF2,REV1,LIPT1,PAPOLA,AKAP7,ALK,APBB2,ARAP2,ARNTL,PTH,ATP2B2,ZFPM2,FZD6,TTLL5,RFX6,T,RPS6KA2,BTRC,POLL,RFX4,ADAMTS12,CAD,PPM1G,CAND1,SPEF2,PNPT1,NR2C2,PPIAP4,PSAP,CTNNBIP1,NMNAT1,UBE4B,GFPT2,PRKAR2B,H2AFY2,AIFM2,SAR1A,EIF4EBP2,NODAL,ZNF7,ZNF517,ZNF250,RPL8,ZNF34,CORIN,USP10,CTH,LOC485601,RPSA,C8A,CCDC76,POLR3A,DNMT3A,EFCAB10,EHMT1,ERLIN1,SCD,HIF1AN,TASP1,FAM103A1,ARNT2,PET112,LAP…
2.63e-10	4109	1100	269	GO:0044237	BP	cellular metabolic process	ACACA,IL3_CANFA,CSF2,REV1,LYG1,LYG2,LIPT1,PAPOLA,AKAP7,ALK,APBB2,ARAP2,ARNTL,PTH,ATP2B2,AZIN1,ZFPM2,OXR1,FZD6,TTLL5,RFX6,T,RPS6KA2,BTRC,POLL,RFX4,CAD,EIF2B4,PPM1G,CAND1,SPEF2,PNPT1,NR2C2,PPIAP4,PSAP,CTNNBIP1,NMNAT1,UBE4B,PRKAR2B,H2AFY2,AIFM2,SAR1A,PPA1,EIF4EBP2,NODAL,ZNF7,ZNF517,ZNF250,RPL8,ZNF34,USP10,CTH,ANKRD13C,RPSA,DBT,CCDC76,POLR3A,DNMT3A,EFCAB10,EHMT1,ERLIN1,SCD,NDUFB8,HIF1AN,TASP1,FAM103A…
6.63e-10	4318	1100	278	GO:0043227	CC	membrane-bounded organelle	ACACA,TADA2A,RAB4A,MITD1,LIPT1,PAPOLA,APBB2,ARNTL,BTBD10,ATP2B2,ZFPM2,SLC25A32,BATF,RSPH4A,KPNA5,BICD1,T,RPS6KA2,RFX4,C7ORF10,VDAC3,SLC30A3,SNX17,ZNF513,CAND1,SPEF2,NR2C2,ZFYVE20,CCDC90B,CD274,PSAP,TUFT1,CTNNBIP1,KIF1B,GAS8,COG5,H2AFY2,AIFM2,SAR1A,NFXL1,CNGA1,CRISPLD2,USP10,CTH,ANKRD13C,RPSA,DBT,S35A3_CANFA,POLR3A,EHMT1,ZMYND19,ERGIC1,ERLIN1,CHUK,PKD2L1,SCD,NDUFB8,HIF1AN,ESF1,FAM103A1,ARNT2,PET11…
7.23e-10	4302	1100	277	GO:0043231	CC	intracellular membrane-bounded organelle	ACACA,TADA2A,RAB4A,MITD1,LIPT1,PAPOLA,APBB2,ARNTL,BTBD10,ATP2B2,ZFPM2,SLC25A32,BATF,RSPH4A,KPNA5,BICD1,T,RPS6KA2,RFX4,C7ORF10,VDAC3,SLC30A3,SNX17,ZNF513,CAND1,SPEF2,NR2C2,ZFYVE20,CCDC90B,PSAP,TUFT1,CTNNBIP1,KIF1B,GAS8,COG5,H2AFY2,AIFM2,SAR1A,NFXL1,CNGA1,CRISPLD2,USP10,CTH,ANKRD13C,RPSA,DBT,S35A3_CANFA,POLR3A,EHMT1,ZMYND19,ERGIC1,ERLIN1,CHUK,PKD2L1,SCD,NDUFB8,HIF1AN,ESF1,FAM103A1,ARNT2,PET112,SEMA…
2.57e-09	4411	1100	280	GO:0003824	MF	catalytic activity	ACACA,ACSL6,RAB4A,ADAMTSL3,REV1,EIF5B,LYG1,LYG2,LIPT1,AK7,PAPOLA,AKAP7,ALDH1A1,ALK,RAP1B,FAR1,ATP2B2,ATP6V1C2,AZIN1,TTLL5,LOC612537,RPS6KA2,BTRC,POLL,C7ORF10,PDE10A,AMACR,ADAMTS12,CAD,PPM1G,SPEF2,PNPT1,PPIAP4,CGN,NMNAT1,UBE4B,KIF1B,GFPT2,MAPK9,AIFM2,SAR1A,PPA1,AGXT2L2,CORIN,CREG2,USP10,CTH,LOC485601,DBT,CCDC76,POLR3A,DNMT3A,ECHDC1,EFCAB10,Q6QT04_CANFA,EHMT1,DUSP1,CHUK,CWF19L1,SCD,NDUFB8,HIF1AN,TA…
2.85e-09	2564	1100	182	GO:0006807	BP	nitrogen compound metabolic process	IL3_CANFA,CSF2,REV1,LYG1,LYG2,PAPOLA,AKAP7,APBB2,ARAP2,ARNTL,PTH,ATP2B2,AZIN1,ZFPM2,FZD6,RFX6,T,BTRC,POLL,RFX4,CAD,SPEF2,PNPT1,NR2C2,PSAP,CTNNBIP1,NMNAT1,H2AFY2,AIFM2,NODAL,ZNF7,ZNF517,ZNF250,ZNF34,CTH,CCDC76,POLR3A,DNMT3A,EFCAB10,EHMT1,HIF1AN,TASP1,FAM103A1,ARNT2,PET112,PION,DDX41,FANCC,ARAP1,PDE2A,FSHR,GDA,HR,ABP1,GNAQ,GPHN,GTF2F2,EAF1,HIPK3,HRH2_CANFA,IARS2,RAB3GAP2,IFNG,INTS7,DTL,TARBP1,KAT6B…
4.88e-09	2310	1100	167	GO:0046483	BP	heterocycle metabolic process	IL3_CANFA,CSF2,REV1,PAPOLA,AKAP7,APBB2,ARAP2,ARNTL,PTH,ATP2B2,ZFPM2,FZD6,RFX6,T,BTRC,POLL,RFX4,CAD,SPEF2,PNPT1,NR2C2,CTNNBIP1,NMNAT1,H2AFY2,AIFM2,NODAL,ZNF7,ZNF517,ZNF250,ZNF34,CTH,CCDC76,POLR3A,DNMT3A,EFCAB10,EHMT1,HIF1AN,TASP1,FAM103A1,ARNT2,PET112,DDX41,FANCC,ARAP1,PDE2A,FSHR,GDA,HR,GNAQ,GPHN,GTF2F2,EAF1,HIPK3,HRH2_CANFA,IARS2,RAB3GAP2,IFNG,INTS7,DTL,TARBP1,KAT6B,MACROD1,KLF9,SMC5,ARRB1,EOMES,…
5.39e-09	2403	1100	172	GO:1901360	BP	organic cyclic compound metabolic process	IL3_CANFA,CSF2,REV1,PAPOLA,AKAP7,APBB2,ARAP2,ARNTL,PTH,ATP2B2,ZFPM2,FZD6,RFX6,T,BTRC,POLL,RFX4,CAD,SPEF2,PNPT1,NR2C2,CTNNBIP1,NMNAT1,H2AFY2,AIFM2,NODAL,ZNF7,ZNF517,ZNF250,ZNF34,CTH,CCDC76,POLR3A,DNMT3A,EFCAB10,EHMT1,HIF1AN,TASP1,FAM103A1,ARNT2,PET112,DDX41,ARV1,FANCC,ARAP1,PDE2A,FSHR,GDA,HR,GNAQ,GPHN,GTF2F2,EAF1,HIPK3,HRH2_CANFA,IARS2,RAB3GAP2,IFNG,INTS7,DTL,TARBP1,KAT6B,MACROD1,KLF9,SMC5,ARRB1,E…
1.14e-08	2139	1100	156	GO:0007154	BP	cell communication	ABR,IL3_CANFA,CSF2,RAB4A,ALK,RAP1B,ARAP2,ARHGAP19,PTH,ATP2B2,FZD6,LOC100684449,RIMS2,GPRC6A,T,RPS6KA2,BTRC,PDE10A,EIF2B4,SNX17,FGD5,TRH,CD274,PSAP,TUFT1,RIIAD1,CTNNBIP1,KIF1B,RASGEF1C,PRKAR2B,EIF4EBP2,NODAL,USP10,CTH,LECT2,DCDC2C,DOCK8,EFCAB10,Q6QT04_CANFA,CHUK,WNT8B,HIF1AN,SEMA4C,GRK6,DOK3,FBN2,ARAP1,PDE2A,FREM1,ABP1,GNAQ,GNA14,MPP5,GPR125,GRB10,GRM5,HIPK3,HRH2_CANFA,IFNG,KIF16B,KLF9,JPH3,ARRB1,…
1.33e-08	2323	1100	166	GO:0006725	BP	cellular aromatic compound metabolic process	IL3_CANFA,CSF2,REV1,PAPOLA,AKAP7,APBB2,ARAP2,ARNTL,PTH,ATP2B2,ZFPM2,FZD6,RFX6,T,BTRC,POLL,RFX4,CAD,SPEF2,PNPT1,NR2C2,CTNNBIP1,NMNAT1,H2AFY2,AIFM2,NODAL,ZNF7,ZNF517,ZNF250,ZNF34,CTH,CCDC76,POLR3A,DNMT3A,EFCAB10,EHMT1,HIF1AN,TASP1,FAM103A1,ARNT2,PET112,DDX41,FANCC,ARAP1,PDE2A,FSHR,GDA,HR,GNAQ,GTF2F2,EAF1,HIPK3,HRH2_CANFA,IARS2,RAB3GAP2,IFNG,INTS7,DTL,TARBP1,KAT6B,MACROD1,KLF9,SMC5,ARRB1,EOMES,SMO,L…
1.99e-08	3623	1100	235	GO:0043170	BP	macromolecule metabolic process	ACACA,IL3_CANFA,CSF2,REV1,LYG1,LYG2,LIPT1,PAPOLA,AKAP7,ALK,APBB2,ARNTL,PTH,ZFPM2,OXR1,FZD6,TTLL5,RFX6,T,RPS6KA2,BTRC,POLL,RFX4,ADAMTS12,PPM1G,CAND1,IL7R,PNPT1,NR2C2,PPIAP4,CTNNBIP1,UBE4B,H2AFY2,AIFM2,SAR1A,EIF4EBP2,NODAL,ZNF7,ZNF517,ZNF250,RPL8,ZNF34,CORIN,USP10,CTH,ANKRD13C,LOC485601,RPSA,C8A,CCDC76,POLR3A,DNMT3A,EFCAB10,EHMT1,ERLIN1,WNT8B,HIF1AN,TASP1,FAM103A1,ARNT2,PET112,LAP3,PION,DDX41,CAPN9…
2.12e-08	2374	1100	168	GO:0034641	BP	cellular nitrogen compound metabolic process	IL3_CANFA,CSF2,REV1,PAPOLA,AKAP7,APBB2,ARAP2,ARNTL,PTH,ATP2B2,AZIN1,ZFPM2,FZD6,RFX6,T,BTRC,POLL,RFX4,CAD,SPEF2,PNPT1,NR2C2,CTNNBIP1,NMNAT1,H2AFY2,AIFM2,NODAL,ZNF7,ZNF517,ZNF250,ZNF34,CTH,CCDC76,POLR3A,DNMT3A,EFCAB10,EHMT1,HIF1AN,TASP1,FAM103A1,ARNT2,PET112,PION,DDX41,FANCC,ARAP1,PDE2A,FSHR,GDA,HR,GNAQ,GTF2F2,EAF1,HIPK3,HRH2_CANFA,IARS2,RAB3GAP2,IFNG,INTS7,DTL,TARBP1,KAT6B,MACROD1,KLF9,SMC5,ARRB1,…
2.53e-08	2235	1100	160	GO:0006139	BP	nucleobase-containing compound metabolic process	IL3_CANFA,CSF2,REV1,PAPOLA,AKAP7,APBB2,ARAP2,ARNTL,PTH,ATP2B2,ZFPM2,FZD6,RFX6,T,BTRC,POLL,RFX4,CAD,SPEF2,PNPT1,NR2C2,CTNNBIP1,NMNAT1,H2AFY2,AIFM2,NODAL,ZNF7,ZNF517,ZNF250,ZNF34,CTH,CCDC76,POLR3A,DNMT3A,EFCAB10,EHMT1,HIF1AN,TASP1,FAM103A1,ARNT2,PET112,DDX41,FANCC,ARAP1,PDE2A,FSHR,GDA,HR,GNAQ,GTF2F2,EAF1,HIPK3,HRH2_CANFA,IARS2,RAB3GAP2,IFNG,INTS7,DTL,TARBP1,KAT6B,MACROD1,KLF9,SMC5,ARRB1,EOMES,SMO,L…
2.9e-08	2937	1100	198	GO:0050896	BP	response to stimulus	ABR,IL3_CANFA,CSF2,RAB4A,REV1,ALK,APBB2,RAP1B,ARAP2,ARHGAP19,PTH,ATP2B2,FZD6,LOC100684449,RIMS2,GPRC6A,T,RPS6KA2,BTRC,POLL,PDE10A,EIF2B4,SNX17,IL7R,FGD5,NR2C2,TRH,CD274,PSAP,TUFT1,RIIAD1,CTNNBIP1,RASGEF1C,PRKAR2B,EIF4EBP2,NODAL,CNGA1,USP10,CTH,CX3CR1,CCR8,CXCL14,LECT2,C8B,C8A,DCDC2C,DOCK8,EFCAB10,Q6QT04_CANFA,CHUK,PKD2L1,WNT8B,HIF1AN,SEMA4C,GRK6,DDX41,DOK3,FANCC,FBN2,ARAP1,PDE2A,ABP1,GNAQ,GNA14,G…
3.99e-08	2052	1100	149	GO:0023052	BP	signaling	ABR,IL3_CANFA,CSF2,RAB4A,ALK,RAP1B,ARAP2,ARHGAP19,PTH,ATP2B2,FZD6,LOC100684449,RIMS2,GPRC6A,T,RPS6KA2,BTRC,PDE10A,EIF2B4,SNX17,FGD5,TRH,CD274,PSAP,TUFT1,RIIAD1,CTNNBIP1,KIF1B,RASGEF1C,PRKAR2B,EIF4EBP2,NODAL,USP10,CTH,LECT2,DCDC2C,DOCK8,EFCAB10,Q6QT04_CANFA,CHUK,WNT8B,HIF1AN,SEMA4C,GRK6,DOK3,FBN2,ARAP1,PDE2A,GNAQ,GNA14,MPP5,GPR125,GRB10,GRM5,HIPK3,HRH2_CANFA,IFNG,KLF9,JPH3,ARRB1,DUSP10,SRGAP1,SMO,…
3.99e-08	2052	1100	149	GO:0044700	BP	single organism signaling	ABR,IL3_CANFA,CSF2,RAB4A,ALK,RAP1B,ARAP2,ARHGAP19,PTH,ATP2B2,FZD6,LOC100684449,RIMS2,GPRC6A,T,RPS6KA2,BTRC,PDE10A,EIF2B4,SNX17,FGD5,TRH,CD274,PSAP,TUFT1,RIIAD1,CTNNBIP1,KIF1B,RASGEF1C,PRKAR2B,EIF4EBP2,NODAL,USP10,CTH,LECT2,DCDC2C,DOCK8,EFCAB10,Q6QT04_CANFA,CHUK,WNT8B,HIF1AN,SEMA4C,GRK6,DOK3,FBN2,ARAP1,PDE2A,GNAQ,GNA14,MPP5,GPR125,GRB10,GRM5,HIPK3,HRH2_CANFA,IFNG,KLF9,JPH3,ARRB1,DUSP10,SRGAP1,SMO,…
6.47e-08	3098	1100	205	GO:0044260	BP	cellular macromolecule metabolic process	IL3_CANFA,CSF2,REV1,LYG1,LYG2,LIPT1,PAPOLA,AKAP7,ALK,APBB2,ARNTL,PTH,ZFPM2,OXR1,FZD6,TTLL5,RFX6,T,RPS6KA2,BTRC,POLL,RFX4,PPM1G,CAND1,PNPT1,NR2C2,PPIAP4,CTNNBIP1,UBE4B,H2AFY2,AIFM2,EIF4EBP2,NODAL,ZNF7,ZNF517,ZNF250,RPL8,ZNF34,USP10,CTH,ANKRD13C,RPSA,CCDC76,POLR3A,DNMT3A,EFCAB10,EHMT1,ERLIN1,HIF1AN,TASP1,FAM103A1,ARNT2,PET112,DDX41,FANCC,PDE2A,FSHR,HR,GPHN,GTF2F2,EAF1,HIPK3,IARS2,IFNG,INTS7,DTL,TAR…
1.22e-07	5805	1100	341	GO:0044424	CC	intracellular part	ACACA,TADA2A,RAB4A,MITD1,LIPT1,PAPOLA,APBB2,RAP1B,ARNTL,BTBD10,ATP2B2,ZFPM2,BAALC,FZD6,LOC100684449,SLC25A32,DCAF13,BATF,RSPH4A,KPNA5,BICD1,T,RPS6KA2,BTRC,RFX4,C7ORF10,VDAC3,SLC30A3,TRIM54,EIF2B4,SNX17,ZNF513,CAND1,SPEF2,NR2C2,ZFYVE20,CCDC90B,PSAP,CGN,TUFT1,CTNNBIP1,UBE4B,KIF1B,GAS8,DBNDD1,GFPT2,CNTN5,COG5,PRKAR2B,H2AFY2,AIFM2,SAR1A,PPA1,RPL8,NFXL1,CNGA1,CRISPLD2,USP10,CTH,ANKRD13C,RPSA,DBT,SASS6…
5.06e-07	1809	1100	131	GO:0019222	BP	regulation of metabolic process	IL3_CANFA,CSF2,ALK,APBB2,ARAP2,PTH,ZFPM2,FZD6,RFX6,T,RPS6KA2,BTRC,RFX4,CAND1,IL7R,NR2C2,PSAP,CTNNBIP1,H2AFY2,SAR1A,EIF4EBP2,NODAL,ZNF7,ZNF517,ZNF250,ZNF34,USP10,CTH,ANKRD13C,DNMT3A,EHMT1,WNT8B,HIF1AN,TASP1,ARNT2,PION,DDX41,ARV1,ARAP1,PDE2A,HR,GNAQ,EAF1,HIPK3,HRH2_CANFA,RAB3GAP2,IFNG,KAT6B,KLF9,ARRB1,DUSP10,SMO,TIMP3,HTR2A,WIBG,CDK2,RNF41,ACO1,VWC2,MAGI2,ZNF354A,PPP2R3A,MAML2,EGR1,CTSH,WDR61,NDST2…
5.87e-07	1903	1100	136	GO:0090304	BP	nucleic acid metabolic process	IL3_CANFA,CSF2,REV1,PAPOLA,AKAP7,APBB2,ARNTL,PTH,ZFPM2,FZD6,RFX6,T,BTRC,POLL,RFX4,PNPT1,NR2C2,CTNNBIP1,H2AFY2,AIFM2,NODAL,ZNF7,ZNF517,ZNF250,ZNF34,CTH,CCDC76,POLR3A,DNMT3A,EFCAB10,EHMT1,HIF1AN,TASP1,FAM103A1,ARNT2,PET112,DDX41,FANCC,PDE2A,FSHR,HR,GTF2F2,EAF1,HIPK3,IARS2,IFNG,INTS7,DTL,TARBP1,KAT6B,KLF9,SMC5,ARRB1,EOMES,SMO,LOC100684639,WIBG,CDK2,OBFC2B,VWC2,ZNF354A,MAML2,EGR1,WDR61,LHX1,KDM4C,POP…
6.88e-07	5021	1100	298	GO:0043226	CC	organelle	ACACA,TADA2A,RAB4A,MITD1,LIPT1,PAPOLA,APBB2,ARNTL,BTBD10,ATP2B2,ZFPM2,SLC25A32,BATF,RSPH4A,KPNA5,BICD1,T,RPS6KA2,RFX4,C7ORF10,VDAC3,SLC30A3,TRIM54,SNX17,ZNF513,CAND1,SPEF2,NR2C2,ZFYVE20,CCDC90B,CD274,PSAP,CGN,TUFT1,CTNNBIP1,KIF1B,GAS8,COG5,PRKAR2B,H2AFY2,AIFM2,SAR1A,RPL8,NFXL1,CNGA1,CRISPLD2,USP10,CTH,ANKRD13C,RPSA,DBT,SASS6,S35A3_CANFA,POLR3A,EHMT1,ZMYND19,ERGIC1,ERLIN1,CHUK,PKD2L1,SCD,NDUFB8,HI…
7.06e-07	1381	1100	106	GO:0048518	BP	positive regulation of biological process	IL3_CANFA,CSF2,ALK,APBB2,PTH,ATP2B2,ZFPM2,LOC100684449,T,RPS6KA2,BTRC,FBXW4,RFX4,SLC30A3,IL7R,NR2C2,CD274,CTNNBIP1,AIFM2,NODAL,CTH,C8A,CHUK,WNT8B,HIF1AN,TASP1,ARNT2,SEMA4C,DDX41,FBN2,PDE2A,HRH2_CANFA,IFNG,CNTFR_CANFA,ARRB1,SMO,HTR2A,WIBG,CDK2,RNF41,VWC2,MAGI2,PPP2R3A,MAML2,EGR1,CTSH,WDR61,LHX1,KDM4C,MAB21L2,OSR2,MELK,MTPN,CLEC4E,PEX5,NME1,PPP3CB,OMA1,OVOL2,PDGFC,RHOG,STIM1,PPIH,PRLR,AGXT2,KCNMA1,…
8.09e-07	5009	1100	297	GO:0043229	CC	intracellular organelle	ACACA,TADA2A,RAB4A,MITD1,LIPT1,PAPOLA,APBB2,ARNTL,BTBD10,ATP2B2,ZFPM2,SLC25A32,BATF,RSPH4A,KPNA5,BICD1,T,RPS6KA2,RFX4,C7ORF10,VDAC3,SLC30A3,TRIM54,SNX17,ZNF513,CAND1,SPEF2,NR2C2,ZFYVE20,CCDC90B,PSAP,CGN,TUFT1,CTNNBIP1,KIF1B,GAS8,COG5,PRKAR2B,H2AFY2,AIFM2,SAR1A,RPL8,NFXL1,CNGA1,CRISPLD2,USP10,CTH,ANKRD13C,RPSA,DBT,SASS6,S35A3_CANFA,POLR3A,EHMT1,ZMYND19,ERGIC1,ERLIN1,CHUK,PKD2L1,SCD,NDUFB8,HIF1AN,E…
8.73e-07	790	1100	70	GO:0005576	CC	extracellular region	IL3_CANFA,CSF2,ADAMTSL3,PTH,LOC100684449,C1QTNF3,ADAMTS12,TRIM54,TRH,CD274,RLN1,PSAP,CLSTN1,NODAL,CRISPLD2,CXCL14,WNT8B,FBN2,ABP1,GPC5,IFNE,IFNG,IL26,IL22,CNTFR_CANFA,LAMA2,TIMP3,GDF11,IL23A,ZP4,VWC2,ZPBP,CTSH,ADAMTS7,ANGPT1,LOC482436,HGFAC,CD163,PLA2G12B,PDGFC,PODN,ASIP,ITM2B,CA6,ADAMTS2,VEGFC,Q5JZR0_CANFA,BMP8B,SCUBE1,SFRP1,COL24A1,INHBC,INHBE,IL5,IL13,IL4,D0F1P5_CANFA,SMOC1,SPOCK1,TG,WISP1,THB…
2.1e-06	1981	1100	138	GO:0044707	BP	single-multicellular organism process	ACACA,IL3_CANFA,CSF2,ALK,APBB2,PTH,ATP2B2,ZFPM2,FZD6,LOC100684449,RIMS2,T,RPS6KA2,BTRC,DPCD,FBXW4,RFX4,EIF2B4,ZNF513,IL7R,NR2C2,TRH,CD274,PSAP,CTNNBIP1,KIF1B,CNTN5,PRKAR2B,NODAL,CNGA1,MOBP,E2R8D3_CANFA,EHMT1,CHUK,WNT8B,HIF1AN,ARNT2,SEMA4C,MED28,FBN2,PDE2A,TMEM176B,GPHN,MPP5,GRHL2,GRIN3A,GRM5,HRH2_CANFA,IFNG,CNTFR_CANFA,KLF9,JPH3,ARRB1,LAMA2,DUSP10,SMO,HTR2A,RNF41,MIP,ACO1,VWC2,ZPBP,PPP2R3A,GFRA3,…
3.88e-06	2057	1100	141	GO:0032501	BP	multicellular organismal process	ACACA,IL3_CANFA,CSF2,ALK,APBB2,PTH,ATP2B2,ZFPM2,FZD6,LOC100684449,RIMS2,T,RPS6KA2,BTRC,DPCD,FBXW4,RFX4,EIF2B4,ZNF513,IL7R,NR2C2,TRH,CD274,PSAP,CTNNBIP1,KIF1B,CNTN5,PRKAR2B,NODAL,CNGA1,MOBP,E2R8D3_CANFA,EHMT1,CHUK,WNT8B,HIF1AN,ARNT2,SEMA4C,MED28,FBN2,PDE2A,FSHR,TMEM176B,GPHN,MPP5,GRHL2,GRIN3A,GRM5,HRH2_CANFA,IFNG,CNTFR_CANFA,KLF9,JPH3,ARRB1,LAMA2,DUSP10,SMO,HTR2A,RNF41,MIP,ACO1,VWC2,ZPBP,PPP2R3A,B…
4.24e-06	3678	1100	226	GO:0005737	CC	cytoplasm	ACACA,RAB4A,LIPT1,PAPOLA,APBB2,RAP1B,ARNTL,BTBD10,ATP2B2,ZFPM2,BAALC,FZD6,LOC100684449,SLC25A32,KPNA5,BICD1,T,RPS6KA2,C7ORF10,VDAC3,SLC30A3,EIF2B4,SNX17,SPEF2,CCDC90B,PSAP,TUFT1,CTNNBIP1,KIF1B,GAS8,DBNDD1,GFPT2,CNTN5,COG5,PRKAR2B,AIFM2,SAR1A,PPA1,RPL8,CRISPLD2,USP10,CTH,ANKRD13C,RPSA,DBT,SASS6,S35A3_CANFA,ECHDC1,ZMYND19,ERGIC1,ERLIN1,CHUK,PKD2L1,SCD,NDUFB8,HIF1AN,ARNT2,PET112,SEMA4C,LAP3,MED28,LO…
7.84e-06	1503	1100	109	GO:0048856	BP	anatomical structure development	IL3_CANFA,CSF2,ALK,APBB2,PTH,ATP2B2,ZFPM2,FZD6,LOC100684449,RSPH4A,T,RPS6KA2,BTRC,DPCD,FBXW4,RFX4,EIF2B4,ZNF513,IL7R,NR2C2,PSAP,CTNNBIP1,NODAL,MOBP,EHMT1,CHUK,WNT8B,HIF1AN,ARNT2,SEMA4C,MED28,FBN2,PDE2A,FSHR,TMEM176B,GPHN,MPP5,GRHL2,GRIN3A,IFNG,KIF24,CNTFR_CANFA,LAMA2,DUSP10,FAM40B,SMO,RNF41,MIP,VWC2,ZPBP,PPP2R3A,GFRA3,EGR1,CTSH,WDR61,ANGPT1,LHX1,MAB21L2,MAN1A2,OSR2,ASF1A,MCOLN2,MED27,PEX5,GRIN2B,…
9.17e-06	540	1100	51	GO:0005102	MF	receptor binding	IL3_CANFA,CSF2,PTH,LOC100684449,TRIM54,SNX17,TRH,RLN1,NODAL,ANKRD13C,CXCL14,WNT8B,HIF1AN,ARNT2,DOK3,FGF14,GNAQ,GNA14,IFNE,IFNG,CNTFR_CANFA,ARRB1,LAMA2,SMO,GDF11,RNF41,IL23A,MAGI2,REEP2,KDM4C,LRPAP1,DOK7,NRG3,PDGFC,ASIP,VEGFC,BMP8B,INHBC,INHBE,SIPA1L1,IL5,IL13,IL4,D0F1P5_CANFA,SLC30A9,TAC4,TNFSF15,TNFSF8,TRDN,GDF5,USP15
9.49e-06	2275	1100	151	GO:0051716	BP	cellular response to stimulus	ABR,IL3_CANFA,CSF2,RAB4A,REV1,ALK,RAP1B,ARAP2,ARHGAP19,PTH,FZD6,LOC100684449,RIMS2,GPRC6A,T,RPS6KA2,BTRC,POLL,PDE10A,EIF2B4,SNX17,FGD5,TRH,CD274,PSAP,TUFT1,RIIAD1,CTNNBIP1,RASGEF1C,PRKAR2B,EIF4EBP2,NODAL,USP10,CTH,LECT2,DCDC2C,DOCK8,EFCAB10,Q6QT04_CANFA,CHUK,PKD2L1,WNT8B,HIF1AN,SEMA4C,GRK6,DDX41,DOK3,FANCC,FBN2,ARAP1,PDE2A,ABP1,GNAQ,GNA14,GPR125,GRB10,HIPK3,IFNG,INTS7,DTL,KLF9,SMC5,ARRB1,DUSP10,S…
1.06e-05	1800	1100	125	GO:0051179	BP	localization	RAB4A,APBB2,PTH,ATP2B2,ATP6V1C2,ATP6V1C1,SLC25A32,RIMS2,FLVCR2,KPNA5,BICD1,DPCD,SLC20A2,SLC30A3,SNX17,CD274,TUFT1,KIF1B,GAS8,COG5,SAR1A,NODAL,ANKRD13C,SLC25A38,MOBP,SLC25A48,HIAT1,S35A3_CANFA,ERGIC1,CHUK,PKD2L1,SEMA4C,COG3,SLC25A30,ARV1,FBN2,PDE2A,MPP5,ABHD2,HRH2_CANFA,IFNG,COPG2,JPH3,ARRB1,LAMA2,FAM40B,SMO,HTR2A,CD63,CDK2,RAB5B,RNF41,RYR2,MAGI2,UNC93A,PPP2R3A,CDC23,GFRA3,REEP2,HSPA9,TMED3,CTSH,L…
1.09e-05	1407	1100	103	GO:0044767	BP	single-organism developmental process	IL3_CANFA,CSF2,ALK,APBB2,ATP2B2,ZFPM2,FZD6,LOC100684449,RSPH4A,T,RPS6KA2,BTRC,DPCD,FBXW4,RFX4,EIF2B4,ZNF513,IL7R,NR2C2,PSAP,CTNNBIP1,NODAL,EHMT1,CHUK,HIF1AN,ARNT2,SEMA4C,MED28,FBN2,PDE2A,FSHR,TMEM176B,GPHN,MPP5,GRHL2,GRIN3A,IFNG,KIF24,CNTFR_CANFA,LAMA2,DUSP10,FAM40B,SMO,RNF41,MIP,VWC2,ZPBP,PPP2R3A,EGR1,CTSH,WDR61,ANGPT1,LHX1,MAB21L2,MAN1A2,OSR2,ASF1A,MCOLN2,MED27,PEX5,GRIN2B,NRG3,PPP3CB,OVOL2,PDG…
1.13e-05	1875	1100	129	GO:0007165	BP	signal transduction	ABR,IL3_CANFA,CSF2,RAB4A,ALK,RAP1B,ARAP2,ARHGAP19,PTH,FZD6,LOC100684449,RIMS2,GPRC6A,T,RPS6KA2,BTRC,PDE10A,SNX17,FGD5,TRH,CD274,PSAP,TUFT1,RIIAD1,CTNNBIP1,RASGEF1C,PRKAR2B,EIF4EBP2,NODAL,USP10,CTH,LECT2,DCDC2C,DOCK8,EFCAB10,Q6QT04_CANFA,CHUK,WNT8B,HIF1AN,SEMA4C,GRK6,DOK3,FBN2,ARAP1,PDE2A,GNAQ,GNA14,GPR125,GRB10,HIPK3,IFNG,KLF9,ARRB1,DUSP10,SRGAP1,SMO,HTR2A,ITGA7,LOC100855691,CDK2,RAB5B,RNF41,CDC4…
1.5e-05	1577	1100	112	GO:0080090	BP	regulation of primary metabolic process	IL3_CANFA,CSF2,ALK,APBB2,ARAP2,PTH,ZFPM2,FZD6,RFX6,T,RPS6KA2,BTRC,RFX4,NR2C2,PSAP,CTNNBIP1,SAR1A,EIF4EBP2,NODAL,ZNF7,ZNF517,ZNF250,ZNF34,CTH,EHMT1,HIF1AN,TASP1,ARNT2,PION,DDX41,ARV1,ARAP1,PDE2A,HR,GNAQ,EAF1,HIPK3,HRH2_CANFA,RAB3GAP2,IFNG,KAT6B,KLF9,ARRB1,DUSP10,SMO,TIMP3,HTR2A,WIBG,CDK2,ACO1,VWC2,ZNF354A,PPP2R3A,MAML2,EGR1,WDR61,NDST2,LHX1,KDM4C,OSR2,MED27,PAX5,MTPN,NME1,OVOL2,PDGFC,RHOG,HES4,SMG…
1.93e-05	2284	1100	150	GO:0005515	MF	protein binding	IL3_CANFA,CSF2,APBB2,ARNTL,PTH,ATP2B2,ZFPM2,FZD6,LOC100684449,RIMS2,T,BTRC,TRIM54,SNX17,NR2C2,ZFYVE20,TRH,RLN1,CTNNBIP1,LOC100855658,GAS8,PRKAR2B,H2AFY2,SAR1A,EIF4EBP2,NODAL,USP10,ANKRD13C,CCR8,RPSA,MOBP,CXCL14,DLG5,EHMT1,CHUK,PKD2L1,WNT8B,HIF1AN,ARNT2,DOK3,DBN1,FGF14,ABP1,GNAQ,GNA14,GPC5,MPP5,GRIN3A,IFNE,IFNG,C9ORF24,CNTFR_CANFA,ARRB1,LAMA2,LIMCH1,SMO,GDF11,CDK2,RAB5B,RNF41,IL23A,RYR2,MAGI2,LRRK…
2.09e-05	1552	1100	110	GO:0060255	BP	regulation of macromolecule metabolic process	IL3_CANFA,CSF2,ALK,APBB2,PTH,ZFPM2,FZD6,RFX6,T,RPS6KA2,BTRC,RFX4,IL7R,NR2C2,CTNNBIP1,H2AFY2,EIF4EBP2,NODAL,ZNF7,ZNF517,ZNF250,ZNF34,CTH,ANKRD13C,DNMT3A,EHMT1,WNT8B,HIF1AN,TASP1,ARNT2,PION,DDX41,PDE2A,HR,EAF1,HIPK3,IFNG,KAT6B,KLF9,ARRB1,DUSP10,SMO,TIMP3,WIBG,CDK2,ACO1,VWC2,MAGI2,ZNF354A,PPP2R3A,MAML2,EGR1,CTSH,WDR61,NDST2,LHX1,KDM4C,OSR2,MED27,PAX5,MTPN,NME1,PPP3CB,OVOL2,PDGFC,RHOG,HES4,SMG8,EPAS1…
2.26e-05	1699	1100	118	GO:0032502	BP	developmental process	IL3_CANFA,CSF2,ALK,APBB2,PTH,ATP2B2,ZFPM2,FZD6,LOC100684449,RSPH4A,T,RPS6KA2,BTRC,DPCD,FBXW4,RFX4,EIF2B4,ZNF513,CAND1,IL7R,NR2C2,PSAP,CTNNBIP1,NODAL,MOBP,EHMT1,CHUK,WNT8B,HIF1AN,ARNT2,SEMA4C,MED28,FBN2,PDE2A,FSHR,TMEM176B,GPHN,MPP5,GRHL2,GRIN3A,IFNG,KIF24,CNTFR_CANFA,KLF9,LAMA2,DUSP10,FAM40B,SMO,RNF41,MIP,ACO1,VWC2,ZPBP,PPP2R3A,BRD8,GFRA3,EGR1,CTSH,WDR61,ANGPT1,LHX1,MAB21L2,MAN1A2,OSR2,ASF1A,MCOL…
2.33e-05	1237	1100	92	GO:0048522	BP	positive regulation of cellular process	IL3_CANFA,CSF2,ALK,APBB2,PTH,ZFPM2,LOC100684449,T,RPS6KA2,BTRC,FBXW4,RFX4,IL7R,NR2C2,CD274,CTNNBIP1,AIFM2,NODAL,CTH,CHUK,HIF1AN,TASP1,ARNT2,SEMA4C,DDX41,FBN2,IFNG,CNTFR_CANFA,ARRB1,SMO,HTR2A,WIBG,CDK2,RNF41,VWC2,MAGI2,PPP2R3A,MAML2,EGR1,CTSH,WDR61,LHX1,KDM4C,MAB21L2,OSR2,MELK,MTPN,CLEC4E,NME1,PPP3CB,OVOL2,PDGFC,RHOG,PPIH,PRLR,AGXT2,KCNMA1,RARB,ITM2B,RFX3,PFN2,MAML1,VEGFC,FGFR1OP,NFYC,AMOTL1,SH3GL…
2.42e-05	20	1100	8	GO:0021549	BP	cerebellum development	ATP2B2,RFX4,NR2C2,SEMA4C,SMO,LHX1,GLI1,UQCRQ
6.37e-05	364	1100	37	GO:0042995	CC	cell projection	ATP2B2,FZD6,SLC30A3,SPEF2,GAS8,CNGA1,SEMA4C,GRIN3A,GRM5,ARRB1,SMO,HTR2A,TOPORS,MTPN,GRIN2B,NME1,SNX5,PIP5K1B,PSEN1,KCNMA1,RAB10,PFN2,Q5JZR0_CANFA,AMOTL1,GLI1,DCTN2,KIF5A,SLC22A5,KIF3A,EXOC4,GNB1,FGD4,TMEM17,PI4K2A,ZFYVE27,UHMK1,WDR19
6.76e-05	1094	1100	82	GO:0048869	BP	cellular developmental process	CSF2,ALK,APBB2,ATP2B2,ZFPM2,FZD6,LOC100684449,RSPH4A,T,RPS6KA2,EIF2B4,CAND1,IL7R,PSAP,CTNNBIP1,NODAL,CHUK,WNT8B,HIF1AN,SEMA4C,MED28,FBN2,PDE2A,FSHR,TMEM176B,GPHN,MPP5,GRIN3A,IFNG,KIF24,DUSP10,FAM40B,SMO,RNF41,VWC2,ZPBP,PPP2R3A,BRD8,GFRA3,EGR1,WDR61,ANGPT1,LHX1,OSR2,ASF1A,MCOLN2,MED27,PEX5,NME1,PPP3CB,OVOL2,EPAS1,KCNMA1,RAB10,RARB,RHOH,RBP1,RFX3,CAP1,GLI1,SIPA1L1,MYPN,LOC100855872,IL4,KIF3A,SHROOM…
6.86e-05	7	1100	5	GO:0021696	BP	cerebellar cortex morphogenesis	ATP2B2,RFX4,SMO,LHX1,GLI1
8.5e-05	1419	1100	100	GO:0051234	BP	establishment of localization	RAB4A,PTH,ATP2B2,ATP6V1C2,ATP6V1C1,SLC25A32,RIMS2,FLVCR2,KPNA5,BICD1,SLC20A2,SLC30A3,SNX17,CD274,TUFT1,KIF1B,COG5,SAR1A,NODAL,SLC25A38,MOBP,SLC25A48,HIAT1,S35A3_CANFA,ERGIC1,CHUK,PKD2L1,COG3,SLC25A30,ARV1,PDE2A,HRH2_CANFA,IFNG,COPG2,JPH3,ARRB1,SMO,HTR2A,CD63,CDK2,RAB5B,RYR2,MAGI2,UNC93A,CDC23,REEP2,HSPA9,TMED3,SLC25A26,SLC13A4,NECAP1,CLEC4E,PEX5,NME1,PPP3CB,SNX5,EFCAB4B,RHOG,STIM1,VTI1B,F1PWF9_CA…
9.24e-05	4154	1100	242	GO:0016020	CC	membrane	MITD1,ALK,ANO2,RAP1B,ATP2B2,ATP6V1C2,ATP6V1C1,P2RY2,FZD6,SLC25A32,FLVCR2,C8H14ORF1,GPRC6A,RXFP3,SLC20A2,VDAC3,SLC30A3,MPV17,IL7R,CD274,CDH23,CLSTN1,KIF1B,LOC489647,PRKAR2B,AIFM2,CORIN,CNGA1,CX3CR1,CCR8,SLC25A38,RPSA,SLC25A48,C8B,C8A,HIAT1,S35A3_CANFA,DCHS2,E2R8D3_CANFA,Q6QT04_CANFA,ZMYND19,ERLIN1,PKD2L1,SCD,NDUFB8,SEMA4C,COG3,SLC25A30,PDE2A,FREM1,FSHR,TMEM176B,TMEM176A,ABP1,GNAQ,GPC5,MPP5,GPR125,…
0.000103	1625	1100	111	GO:0031323	BP	regulation of cellular metabolic process	IL3_CANFA,CSF2,ALK,APBB2,ARAP2,PTH,ZFPM2,FZD6,RFX6,T,BTRC,RFX4,NR2C2,CTNNBIP1,SAR1A,EIF4EBP2,NODAL,ZNF7,ZNF517,ZNF250,ZNF34,USP10,CTH,ANKRD13C,EHMT1,HIF1AN,TASP1,ARNT2,DDX41,ARAP1,PDE2A,HR,GNAQ,EAF1,HIPK3,HRH2_CANFA,RAB3GAP2,IFNG,KAT6B,KLF9,ARRB1,DUSP10,SMO,TIMP3,HTR2A,WIBG,CDK2,RNF41,ACO1,VWC2,MAGI2,ZNF354A,MAML2,EGR1,WDR61,LHX1,KDM4C,OSR2,MED27,PAX5,MTPN,NME1,OVOL2,PDGFC,RHOG,HES4,SMG8,EPAS1,PR…
0.000106	1553	1100	107	GO:0008270	MF	zinc ion binding	TADA2A,ADAMTSL3,ARAP2,ZFPM2,RIMS2,BCL11A,ZUFSP,ADAMTS12,TRIM54,ZNF513,NR2C2,ZFYVE20,ZNF7,ZNF517,ZNF250,ZNF34,NFXL1,RNF149,MOBP,POLR3A,DTNB,EHMT1,ZMYND19,NEURL1B,HIF1AN,DDX41,PDLIM7,ARAP1,GDA,ABP1,GLI3,NUFIP1,PARP12,KAT6B,KLF14,KLF9,LIMCH1,MMP26,MMP19,IKZF4,ZC3H10,RNF41,TOPORS,MTR,ZNF354A,EGR1,ZFAND6,ADAMTS7,ZSWIM8,LHX1,KDM4C,MARCH3,OSR2,MEX3B,TRIM14,NAPEPLD,GRIN2B,Q3HTT9_CANFA,MSS51,OVOL2,LONRF2,…
0.00011	463	1100	43	GO:0044421	CC	extracellular region part	IL3_CANFA,CSF2,ADAMTSL3,PTH,LOC100684449,C1QTNF3,ADAMTS12,CD274,PSAP,NODAL,WNT8B,FBN2,ABP1,GPC5,IFNE,IFNG,IL26,CNTFR_CANFA,LAMA2,TIMP3,VWC2,CTSH,ADAMTS7,HGFAC,PDGFC,PODN,ITM2B,CA6,ADAMTS2,VEGFC,Q5JZR0_CANFA,SCUBE1,COL24A1,IL5,IL13,IL4,SMOC1,SPOCK1,TG,TNFSF15,TNFSF8,PI4K2A,HPSE2
0.000115	12	1100	6	GO:0021695	BP	cerebellar cortex development	ATP2B2,RFX4,SMO,LHX1,GLI1,UQCRQ
0.000133	1149	1100	84	GO:2000112	BP	regulation of cellular macromolecule biosynthetic process	IL3_CANFA,CSF2,APBB2,PTH,ZFPM2,FZD6,RFX6,T,BTRC,RFX4,NR2C2,CTNNBIP1,EIF4EBP2,NODAL,ZNF7,ZNF517,ZNF250,ZNF34,CTH,EHMT1,HIF1AN,TASP1,ARNT2,DDX41,PDE2A,HR,EAF1,IFNG,KAT6B,KLF9,ARRB1,SMO,WIBG,CDK2,ACO1,VWC2,ZNF354A,MAML2,EGR1,WDR61,LHX1,KDM4C,OSR2,MED27,PAX5,MTPN,NME1,OVOL2,PDGFC,RHOG,HES4,EPAS1,RARB,ITM2B,RFX3,MAML1,ZNF354C,ZNF879,ZNF454,RYBP,SCMH1,NFYC,GLI1,LOC100855872,IL5,IL4,SLC30A9,MBTD1,KLF11,…
0.000149	531	1100	47	GO:0032879	BP	regulation of localization	RAB4A,PTH,ATP2B2,SLC30A3,CD274,NODAL,PDE2A,ABHD2,IFNG,JPH3,ARRB1,LAMA2,SMO,HTR2A,CD63,RAB5B,RNF41,RYR2,MAGI2,PPP2R3A,CTSH,CLEC4E,PPP3CB,RHOG,STIM1,PODN,RFX3,PFN2,VEGFC,FGFR1OP,Q5JZR0_CANFA,AMOTL1,SH3GL2,SH3GLB1,IL5,D0F1P5_CANFA,IL1RL1,SPAG9,PKP2,DNM1L,TAC4,EPHA1,TRDN,SFRP5,UHMK1,CHRM3,CIB1
0.000155	1095	1100	80	KEGG:01100	ke	Metabolic pathways	ACACA,ACSL6,LOC100684768,LIPT1,AK7,ALDH1A1,ATP6V1C2,ATP6V1C1,AMACR,CAD,NMNAT1,CTH,DBT,POLR3A,NDUFB8,LAP3,GDA,TBXAS1,AHCYL2,ALDH1B1,NDUFB6,LOC100855691,Q0QEK9_CANFA,GLS2,ACO1,MTR,BRD8,MTHFS,IDH3A,ACSBG1,NDST2,LOC482436,MAN1A2,MGAT4A,INPP4A,MTAP,NANS,NME1,NTPCR,PLA2G12B,P4HA1,PCCA,RRM1,PIP5K1B,PIGH,ARG2,RDH11,RDH12,SCP2,POLD3,LIPT2,POLR1E,PPCS,GALNTL5,GALNT11,ATP6V1E2,AGXT2,HADHA,NMNAT3,MGAT4B,LTC4…
0.000164	1920	1100	126	GO:0010467	BP	gene expression	CSF2,PAPOLA,APBB2,ARNTL,PTH,ZFPM2,FZD6,RFX6,T,RPS6KA2,BTRC,RFX4,IL7R,PNPT1,NR2C2,CTNNBIP1,H2AFY2,SAR1A,EIF4EBP2,NODAL,ZNF7,ZNF517,ZNF250,RPL8,ZNF34,CTH,RPSA,CCDC76,POLR3A,DNMT3A,EHMT1,WNT8B,HIF1AN,TASP1,FAM103A1,ARNT2,PET112,DDX41,PDE2A,HR,GTF2F2,EAF1,HIPK3,IARS2,IFNG,INTS7,TARBP1,KAT6B,KLF9,RS3_CANFA,ARRB1,EOMES,SMO,WIBG,CDK2,ACO1,VWC2,ZNF354A,MAML2,EGR1,CTSH,WDR61,LHX1,KDM4C,POP1,OSR2,MED27,PAX…
0.000182	1536	1100	105	GO:0016070	BP	RNA metabolic process	PAPOLA,AKAP7,APBB2,ARNTL,PTH,ZFPM2,FZD6,RFX6,T,BTRC,RFX4,PNPT1,NR2C2,CTNNBIP1,NODAL,ZNF7,ZNF517,ZNF250,ZNF34,CTH,CCDC76,POLR3A,EFCAB10,EHMT1,HIF1AN,TASP1,FAM103A1,ARNT2,PET112,DDX41,PDE2A,HR,GTF2F2,EAF1,HIPK3,IARS2,IFNG,INTS7,TARBP1,KAT6B,KLF9,ARRB1,EOMES,SMO,LOC100684639,WIBG,CDK2,VWC2,ZNF354A,MAML2,EGR1,WDR61,LHX1,KDM4C,POP1,OSR2,MED27,PAX5,MTPN,NME1,Q3HTT9_CANFA,SNRPB2,OVOL2,RHOG,HES4,POLR1E,S…
0.000199	1286	1100	91	GO:0010468	BP	regulation of gene expression	CSF2,APBB2,PTH,ZFPM2,FZD6,RFX6,T,RPS6KA2,BTRC,RFX4,IL7R,NR2C2,CTNNBIP1,H2AFY2,EIF4EBP2,NODAL,ZNF7,ZNF517,ZNF250,ZNF34,CTH,DNMT3A,EHMT1,WNT8B,HIF1AN,TASP1,ARNT2,DDX41,PDE2A,HR,EAF1,IFNG,KAT6B,KLF9,ARRB1,SMO,WIBG,CDK2,ACO1,VWC2,ZNF354A,MAML2,EGR1,CTSH,WDR61,LHX1,KDM4C,OSR2,MED27,PAX5,MTPN,NME1,PPP3CB,OVOL2,RHOG,HES4,EPAS1,RARB,RBFOX2,RFX3,MAML1,ZNF354C,ZNF879,ZNF454,RYBP,SCMH1,NFYC,GLI1,LOC10085587…
0.0002	537	1100	47	GO:0005509	MF	calcium ion binding	ATP2B2,CAPSL,CDH23,CLSTN1,LOC489647,DCHS2,DTNB,EFCAB10,PKD2L1,CAPN9,FBN2,FSTL4,FSTL5,NCALD,PPP3R2,KCNIP4,MMP19,LOC100855691,MYL6B,STAT2,VLDLR,RYR2,PPP2R3A,LRP8,MAN1A2,MATN2,MELK,MICU1,CLSTN3,PLA2G12B,ANXA7,PPP3CB,EFCAB4B,STIM1,LTBP1,TBC1D9B,CANX,HPCAL4,SCUBE1,CALML6,SMOC1,SPOCK1,HPCAL1,THBS2,CRTAC1,LTBP2,CIB1
0.000218	1182	1100	85	GO:0010556	BP	regulation of macromolecule biosynthetic process	IL3_CANFA,CSF2,APBB2,PTH,ZFPM2,FZD6,RFX6,T,BTRC,RFX4,NR2C2,CTNNBIP1,EIF4EBP2,NODAL,ZNF7,ZNF517,ZNF250,ZNF34,CTH,ANKRD13C,EHMT1,HIF1AN,TASP1,ARNT2,DDX41,PDE2A,HR,EAF1,IFNG,KAT6B,KLF9,ARRB1,SMO,WIBG,CDK2,ACO1,VWC2,ZNF354A,MAML2,EGR1,WDR61,LHX1,KDM4C,OSR2,MED27,PAX5,MTPN,NME1,OVOL2,PDGFC,RHOG,HES4,EPAS1,RARB,ITM2B,RFX3,MAML1,ZNF354C,ZNF879,ZNF454,RYBP,SCMH1,NFYC,GLI1,LOC100855872,IL5,IL4,SLC30A9,MBT…
0.000229	3944	1100	229	GO:0097159	MF	organic cyclic compound binding	ACACA,TADA2A,RAB4A,REV1,EIF5B,AK7,PAPOLA,ALK,RAP1B,ARNTL,ATP2B2,ZFPM2,BATF,FLVCR2,BCL11A,RFX6,T,RPS6KA2,POLL,RFX4,PDE10A,CAD,EIF2B4,ZNF513,SPEF2,PNPT1,NR2C2,LOC100856524,KIF1B,MAPK9,HBP1,H2AFY2,AIFM2,SAR1A,ZNF7,ZNF517,ZNF250,RPL8,ZNF34,CNGA1,CREG2,RBM25,POLR3A,DNMT3A,EFCAB10,Q6QT04_CANFA,CHUK,FAM103A1,ARNT2,PET112,FAM184B,GRK6,DDX41,PDE2A,GLI3,GNAQ,GNA14,GTF2F2,HACL1,HIPK3,HSF2,IARS2,TARBP1,KIAA1…
0.000231	1399	1100	97	GO:0006810	BP	transport	RAB4A,PTH,ATP2B2,ATP6V1C2,ATP6V1C1,SLC25A32,RIMS2,FLVCR2,KPNA5,BICD1,SLC20A2,SLC30A3,SNX17,CD274,TUFT1,KIF1B,COG5,SAR1A,NODAL,SLC25A38,MOBP,SLC25A48,HIAT1,S35A3_CANFA,ERGIC1,CHUK,PKD2L1,COG3,SLC25A30,ARV1,PDE2A,HRH2_CANFA,IFNG,COPG2,JPH3,ARRB1,SMO,HTR2A,CD63,CDK2,RAB5B,RYR2,MAGI2,UNC93A,REEP2,HSPA9,TMED3,SLC25A26,SLC13A4,NECAP1,CLEC4E,PEX5,NME1,PPP3CB,SNX5,EFCAB4B,STIM1,VTI1B,F1PWF9_CANFA,ATP6V1E…
0.000276	2668	1100	164	GO:0005634	CC	nucleus	TADA2A,PAPOLA,APBB2,ARNTL,BTBD10,ZFPM2,BATF,RSPH4A,KPNA5,T,RPS6KA2,RFX4,ZNF513,CAND1,NR2C2,TUFT1,CTNNBIP1,COG5,H2AFY2,NFXL1,USP10,CTH,RPSA,POLR3A,EHMT1,CHUK,HIF1AN,ESF1,FAM103A1,ARNT2,LAP3,MED28,DDX41,PDE2A,HR,GNAQ,GRHL2,GTF2F2,EAF1,HIPK3,HSF2,INTS7,DTL,IRF2BP2,KAT6B,C9ORF24,KLF9,ARRB1,DUSP10,EOMES,ESD,RCOR3,SARNP,WIBG,CDK2,SMARCC2,OBFC2B,STAT2,SPRYD4,CDC42SE2,TOPORS,MAGI2,MSL2,MAML2,BRD8,CDC23,C…
0.000293	1263	1100	89	GO:0051171	BP	regulation of nitrogen compound metabolic process	IL3_CANFA,CSF2,APBB2,ARAP2,PTH,ZFPM2,FZD6,RFX6,T,BTRC,RFX4,NR2C2,CTNNBIP1,NODAL,ZNF7,ZNF517,ZNF250,ZNF34,CTH,EHMT1,HIF1AN,TASP1,ARNT2,DDX41,ARAP1,PDE2A,HR,GNAQ,EAF1,HRH2_CANFA,RAB3GAP2,IFNG,KAT6B,KLF9,ARRB1,SMO,CDK2,VWC2,ZNF354A,MAML2,EGR1,WDR61,LHX1,KDM4C,OSR2,MED27,PAX5,MTPN,NME1,OVOL2,PDGFC,RHOG,HES4,EPAS1,AGXT2,RARB,RBFOX2,RFX3,MAML1,ZNF354C,ZNF879,ZNF454,RYBP,SCMH1,NFYC,GLI1,SIPA1L1,LOC10085…
0.000322	27	1100	8	GO:0022037	BP	metencephalon development	ATP2B2,RFX4,NR2C2,SEMA4C,SMO,LHX1,GLI1,UQCRQ
0.00034	1250	1100	88	GO:0019219	BP	regulation of nucleobase-containing compound metabolic process	IL3_CANFA,CSF2,APBB2,ARAP2,PTH,ZFPM2,FZD6,RFX6,T,BTRC,RFX4,NR2C2,CTNNBIP1,NODAL,ZNF7,ZNF517,ZNF250,ZNF34,CTH,EHMT1,HIF1AN,TASP1,ARNT2,DDX41,ARAP1,PDE2A,HR,GNAQ,EAF1,HRH2_CANFA,RAB3GAP2,IFNG,KAT6B,KLF9,ARRB1,SMO,CDK2,VWC2,ZNF354A,MAML2,EGR1,WDR61,LHX1,KDM4C,OSR2,MED27,PAX5,MTPN,NME1,OVOL2,PDGFC,RHOG,HES4,EPAS1,RARB,RBFOX2,RFX3,MAML1,ZNF354C,ZNF879,ZNF454,RYBP,SCMH1,NFYC,GLI1,SIPA1L1,LOC100855872,I…
0.000349	1450	1100	99	GO:0018130	BP	heterocycle biosynthetic process	REV1,PAPOLA,APBB2,ARNTL,PTH,ZFPM2,FZD6,RFX6,T,BTRC,RFX4,CAD,NR2C2,CTNNBIP1,NMNAT1,NODAL,ZNF7,ZNF517,ZNF250,ZNF34,CTH,POLR3A,EHMT1,HIF1AN,TASP1,ARNT2,DDX41,PDE2A,HR,GPHN,GTF2F2,EAF1,HIPK3,IFNG,DTL,KAT6B,KLF9,ARRB1,EOMES,SMO,CDK2,VWC2,ZNF354A,MAML2,BRD8,EGR1,MTHFS,WDR61,LHX1,KDM4C,OSR2,MED27,PAX5,MTAP,MTPN,NME1,Q3HTT9_CANFA,OVOL2,RHOG,RRM1,HES4,LIPT2,POLR1E,EPAS1,RANBP3L,RARB,NMNAT3,RFX3,MAML1,ZNF3…
0.000352	1764	1100	116	GO:0046914	MF	transition metal ion binding	TADA2A,ADAMTSL3,ARAP2,ZFPM2,RIMS2,BCL11A,ZUFSP,ADAMTS12,TRIM54,ZNF513,NR2C2,ZFYVE20,ZNF7,ZNF517,ZNF250,ZNF34,NFXL1,RNF149,MOBP,POLR3A,DTNB,EHMT1,ZMYND19,NEURL1B,SCD,HIF1AN,LAP3,DDX41,PDLIM7,ARAP1,GDA,ABP1,GLI3,NUFIP1,PARP12,TBXAS1,KAT6B,KLF14,KLF9,LIMCH1,MMP26,MMP19,SUOX,IKZF4,ZC3H10,RNF41,TOPORS,PPM1B,MTR,ZNF354A,EGR1,ZFAND6,ADAMTS7,ZSWIM8,LHX1,KDM4C,MARCH3,OSR2,MEX3B,TRIM14,NAPEPLD,GRIN2B,Q3HTT…
0.000387	519	1100	45	GO:0008283	BP	cell proliferation	IL3_CANFA,CSF2,RAP1B,FZD6,LOC100684449,T,RPS6KA2,BTRC,FBXW4,IL7R,CD274,CTNNBIP1,NODAL,CHUK,IFNG,CNTFR_CANFA,SMO,CDK2,RNF41,CTSH,LHX1,KDM4C,MAB21L2,OSR2,MELK,OVOL2,PDGFC,PODN,RAB10,RARB,VEGFC,FGFR1OP,GLI1,DCTN2,LOC100855872,IL4,D0F1P5_CANFA,GNB1,FGFR1,KLF11,EPHA1,SFRP5,GDF5,LOC607701,CIB1
0.0004	84	1100	14	GO:0005929	CC	cilium	ATP2B2,SPEF2,GAS8,CNGA1,SMO,TOPORS,PSEN1,RAB10,GLI1,KIF5A,KIF3A,GNB1,TMEM17,WDR19
0.000406	3917	1100	226	GO:1901363	MF	heterocyclic compound binding	ACACA,TADA2A,RAB4A,REV1,EIF5B,AK7,PAPOLA,ALK,RAP1B,ARNTL,ATP2B2,ZFPM2,BATF,FLVCR2,BCL11A,RFX6,T,RPS6KA2,POLL,RFX4,PDE10A,CAD,EIF2B4,ZNF513,SPEF2,PNPT1,NR2C2,LOC100856524,KIF1B,MAPK9,HBP1,H2AFY2,AIFM2,SAR1A,ZNF7,ZNF517,ZNF250,RPL8,ZNF34,CNGA1,CREG2,RBM25,POLR3A,DNMT3A,EFCAB10,Q6QT04_CANFA,CHUK,FAM103A1,ARNT2,PET112,FAM184B,GRK6,DDX41,PDE2A,GLI3,GNAQ,GNA14,GTF2F2,HACL1,HIPK3,HSF2,IARS2,TARBP1,KIAA1…
0.000531	55	1100	11	GO:0021915	BP	neural tube development	FZD6,LOC100684449,T,NODAL,SEMA4C,GRHL2,SMO,OVOL2,KIF3A,SFRP5,WDR19
0.000557	559	1100	47	GO:0003008	BP	system process	ATP2B2,RIMS2,RPS6KA2,EIF2B4,CTNNBIP1,KIF1B,CNTN5,PRKAR2B,CNGA1,E2R8D3_CANFA,PDE2A,MPP5,GRIN3A,GRM5,HRH2_CANFA,IFNG,JPH3,HTR2A,MIP,ACO1,REEP2,NDST2,MTPN,PEX5,GRIN2B,CHST10,EPAS1,KCNMA1,CHRNA9,PFN2,CANX,Q5JZR0_CANFA,SH3GL2,SLC22A5,D0F1P5_CANFA,GNB1,PKP2,TAC4,TAS2R16,CLCN1_CANFA,TAS2R40,TMOD1,TG,TRDN,UNC13B,WDR19,CHRM3
0.000557	2047	1100	130	GO:0043168	MF	anion binding	ABR,ACACA,RAB4A,EIF5B,AK7,ALK,RAP1B,ARAP2,ATP2B2,RPS6KA2,PDE10A,CAD,SNX17,SPEF2,FGD5,TUFT1,KIF1B,MAPK9,AIFM2,SAR1A,AGXT2L2,CNGA1,CREG2,CRISPLD2,CTH,Q6QT04_CANFA,CHUK,HIF1AN,PET112,GRK6,DDX41,DOK3,ARAP1,PDE2A,ABP1,GNAQ,GNA14,GPC5,GRB10,GRIN3A,GTF2F2,HACL1,HIPK3,IARS2,KIAA1804,KIF16B,KIF24,ATAD2B,PRKACB,DCLK3,CDK2,RAB5B,ERBB3,DDX58,LRRK1,BRD8,KIF20A,HSPA9,MTHFS,RASGRF1,DNAJA4,CAMK2G,LRPAP1,DOK7,LRR…
0.00056	1267	1100	88	GO:0048731	BP	system development	IL3_CANFA,CSF2,ALK,APBB2,PTH,ATP2B2,ZFPM2,FZD6,LOC100684449,T,RPS6KA2,BTRC,DPCD,FBXW4,RFX4,EIF2B4,ZNF513,IL7R,NR2C2,PSAP,CTNNBIP1,NODAL,MOBP,CHUK,WNT8B,HIF1AN,ARNT2,SEMA4C,FBN2,TMEM176B,GPHN,MPP5,GRHL2,GRIN3A,IFNG,CNTFR_CANFA,SMO,RNF41,MIP,VWC2,PPP2R3A,GFRA3,EGR1,CTSH,WDR61,ANGPT1,LHX1,MAB21L2,MAN1A2,OSR2,MCOLN2,PEX5,GRIN2B,NME1,PPP3CB,OVOL2,PDGFC,EPAS1,KCNMA1,RAB10,RARB,CHRNA9,RHOH,RBP1,RFX3,VEG…
0.000617	1471	1100	99	GO:0044271	BP	cellular nitrogen compound biosynthetic process	REV1,PAPOLA,APBB2,ARNTL,PTH,AZIN1,ZFPM2,FZD6,RFX6,T,BTRC,RFX4,CAD,NR2C2,CTNNBIP1,NMNAT1,NODAL,ZNF7,ZNF517,ZNF250,ZNF34,CTH,POLR3A,EHMT1,HIF1AN,TASP1,ARNT2,DDX41,PDE2A,HR,GTF2F2,EAF1,HIPK3,IFNG,DTL,KAT6B,KLF9,ARRB1,EOMES,SMO,CDK2,VWC2,ZNF354A,MAML2,BRD8,EGR1,MTHFS,WDR61,LHX1,KDM4C,OSR2,MED27,PAX5,MTAP,MTPN,NME1,Q3HTT9_CANFA,OVOL2,RHOG,RRM1,HES4,POLR1E,EPAS1,AGXT2,RANBP3L,RARB,NMNAT3,RFX3,MAML1,ZNF…
0.000629	1253	1100	87	GO:0009889	BP	regulation of biosynthetic process	IL3_CANFA,CSF2,APBB2,PTH,ZFPM2,FZD6,RFX6,T,BTRC,RFX4,NR2C2,CTNNBIP1,EIF4EBP2,NODAL,ZNF7,ZNF517,ZNF250,ZNF34,CTH,ANKRD13C,EHMT1,HIF1AN,TASP1,ARNT2,DDX41,PDE2A,HR,EAF1,IFNG,KAT6B,KLF9,ARRB1,SMO,HTR2A,WIBG,CDK2,ACO1,VWC2,ZNF354A,MAML2,EGR1,WDR61,LHX1,KDM4C,OSR2,MED27,PAX5,MTPN,NME1,OVOL2,PDGFC,RHOG,HES4,EPAS1,AGXT2,RARB,ITM2B,RFX3,MAML1,ZNF354C,ZNF879,ZNF454,RYBP,SCMH1,NFYC,GLI1,LOC100855872,IL5,IL4…
0.000655	191	1100	22	KEGG:04060	ke	Cytokine-cytokine receptor interaction	IL3_CANFA,CSF2,IL7R,CX3CR1,CCR8,CXCL14,Q6QT04_CANFA,IFNG,IL22,CNTFR_CANFA,IL23A,PRLR,VEGFC,IL5,IL13,IL4,IL18RAP,IL18R1,LOC100855848,TNFSF15,TNFSF8,CD27
0.000749	1241	1100	86	GO:0031326	BP	regulation of cellular biosynthetic process	IL3_CANFA,CSF2,APBB2,PTH,ZFPM2,FZD6,RFX6,T,BTRC,RFX4,NR2C2,CTNNBIP1,EIF4EBP2,NODAL,ZNF7,ZNF517,ZNF250,ZNF34,CTH,EHMT1,HIF1AN,TASP1,ARNT2,DDX41,PDE2A,HR,EAF1,IFNG,KAT6B,KLF9,ARRB1,SMO,HTR2A,WIBG,CDK2,ACO1,VWC2,ZNF354A,MAML2,EGR1,WDR61,LHX1,KDM4C,OSR2,MED27,PAX5,MTPN,NME1,OVOL2,PDGFC,RHOG,HES4,EPAS1,AGXT2,RARB,ITM2B,RFX3,MAML1,ZNF354C,ZNF879,ZNF454,RYBP,SCMH1,NFYC,GLI1,LOC100855872,IL5,IL4,SLC30A9,…
0.000772	1406	1100	95	GO:0034654	BP	nucleobase-containing compound biosynthetic process	REV1,PAPOLA,APBB2,ARNTL,PTH,ZFPM2,FZD6,RFX6,T,BTRC,RFX4,NR2C2,CTNNBIP1,NMNAT1,NODAL,ZNF7,ZNF517,ZNF250,ZNF34,CTH,POLR3A,EHMT1,HIF1AN,TASP1,ARNT2,DDX41,PDE2A,HR,GTF2F2,EAF1,HIPK3,IFNG,DTL,KAT6B,KLF9,ARRB1,EOMES,SMO,CDK2,VWC2,ZNF354A,MAML2,BRD8,EGR1,WDR61,LHX1,KDM4C,OSR2,MED27,PAX5,MTAP,MTPN,NME1,Q3HTT9_CANFA,OVOL2,RHOG,RRM1,HES4,POLR1E,EPAS1,RANBP3L,RARB,NMNAT3,RFX3,MAML1,ZNF354C,ZNF879,ZNF454,RYB…
0.000778	2544	1100	155	GO:0044444	CC	cytoplasmic part	ACACA,RAB4A,LIPT1,RAP1B,ATP2B2,SLC25A32,BICD1,C7ORF10,VDAC3,SLC30A3,EIF2B4,SNX17,SPEF2,CCDC90B,PSAP,TUFT1,CTNNBIP1,KIF1B,GAS8,COG5,AIFM2,SAR1A,RPL8,CRISPLD2,USP10,ANKRD13C,RPSA,DBT,SASS6,S35A3_CANFA,ECHDC1,ZMYND19,ERGIC1,ERLIN1,PKD2L1,SCD,NDUFB8,HIF1AN,PET112,SEMA4C,LAP3,MED28,DDX41,SLC25A30,PDE2A,IARS2,C4H1ORF31,KCNK1,VDAC2,MACROD1,KIF24,C9ORF24,COPG2,JPH3,RS3_CANFA,ARRB1,DUSP10,SMO,ESD,CD63,CDK…
0.000803	871	1100	65	GO:0044281	BP	small molecule metabolic process	ACACA,ARAP2,PTH,ATP2B2,CAD,NMNAT1,PRKAR2B,SAR1A,SCD,PET112,ARV1,ARAP1,PDE2A,GDA,GNAQ,HRH2_CANFA,IARS2,RAB3GAP2,IFNG,MACROD1,AHCYL2,HTR2A,ESD,GLS2,ACO1,BRD8,FAH,MTHFS,ACSBG1,LOC482436,MTAP,PEX5,NME1,P4HA1,RHOG,RRM1,ARG2,LIPT2,GDPD1,AGXT2,KCNMA1,HADHA,RANBP3L,RBP1,NMNAT3,CA6,LTC4S,CTPS,NT5C1A,SHMT2,MARS,SIPA1L1,SLC16A9,ABCD2,NADK,SNX18,YARS2,RRM2,EPHA1,TG,LOC100685007,ADSL,LOC100855962,NPC2,IDH2
0.000883	1014	1100	73	GO:0030154	BP	cell differentiation	CSF2,ALK,APBB2,ATP2B2,ZFPM2,FZD6,LOC100684449,T,RPS6KA2,EIF2B4,CAND1,IL7R,PSAP,CTNNBIP1,NODAL,CHUK,WNT8B,HIF1AN,SEMA4C,MED28,FBN2,PDE2A,FSHR,TMEM176B,GPHN,MPP5,GRIN3A,IFNG,DUSP10,SMO,RNF41,VWC2,ZPBP,PPP2R3A,BRD8,GFRA3,EGR1,WDR61,ANGPT1,LHX1,OSR2,ASF1A,MCOLN2,MED27,PEX5,NME1,PPP3CB,OVOL2,EPAS1,KCNMA1,RAB10,RARB,RHOH,RBP1,RFX3,GLI1,SIPA1L1,MYPN,LOC100855872,IL4,D0F1P5_CANFA,UQCRQ,SPAG9,PKP2,EPHA1,T…
0.000913	1486	1100	99	GO:1901362	BP	organic cyclic compound biosynthetic process	REV1,PAPOLA,APBB2,ARNTL,PTH,ZFPM2,FZD6,RFX6,T,BTRC,RFX4,CAD,NR2C2,CTNNBIP1,NMNAT1,NODAL,ZNF7,ZNF517,ZNF250,ZNF34,CTH,POLR3A,EHMT1,HIF1AN,TASP1,ARNT2,DDX41,PDE2A,HR,GPHN,GTF2F2,EAF1,HIPK3,IFNG,DTL,KAT6B,KLF9,ARRB1,EOMES,SMO,CDK2,VWC2,ZNF354A,MAML2,BRD8,EGR1,MTHFS,WDR61,LHX1,KDM4C,OSR2,MED27,PAX5,MTAP,MTPN,NME1,Q3HTT9_CANFA,OVOL2,RHOG,RRM1,HES4,LIPT2,POLR1E,EPAS1,RANBP3L,RARB,NMNAT3,RFX3,MAML1,ZNF3…
0.000992	61	1100	11	KEGG:04720	ke	Long-term potentiation	RAP1B,RPS6KA2,GNAQ,GRIA1,GRM5,PRKACB,CAMK2G,GRIN2B,PPP3CB,ATF4,CALML6
0.00104	2306	1100	142	GO:1901576	BP	organic substance biosynthetic process	ACACA,IL3_CANFA,CSF2,REV1,PAPOLA,APBB2,ARNTL,PTH,AZIN1,ZFPM2,FZD6,RFX6,T,BTRC,RFX4,CAD,NR2C2,CTNNBIP1,NMNAT1,GFPT2,EIF4EBP2,NODAL,ZNF7,ZNF517,ZNF250,RPL8,ZNF34,CTH,ANKRD13C,RPSA,DBT,POLR3A,EHMT1,SCD,HIF1AN,TASP1,ARNT2,PET112,DDX41,PDE2A,HR,GPHN,GTF2F2,EAF1,HIPK3,IARS2,IFNG,DTL,KAT6B,KLF9,RS3_CANFA,ARRB1,EOMES,SMO,HTR2A,WIBG,CDK2,ACO1,VWC2,ZNF354A,MAML2,BRD8,EGR1,MTHFS,WDR61,LHX1,B3GALNT2,KDM4C,OS…
0.00108	1474	1100	98	GO:0007275	BP	multicellular organismal development	IL3_CANFA,CSF2,ALK,APBB2,PTH,ATP2B2,ZFPM2,FZD6,LOC100684449,T,RPS6KA2,BTRC,DPCD,FBXW4,RFX4,EIF2B4,ZNF513,IL7R,NR2C2,PSAP,CTNNBIP1,NODAL,MOBP,EHMT1,CHUK,WNT8B,HIF1AN,ARNT2,SEMA4C,FBN2,TMEM176B,GPHN,MPP5,GRHL2,GRIN3A,IFNG,CNTFR_CANFA,KLF9,LAMA2,SMO,RNF41,MIP,ACO1,VWC2,PPP2R3A,GFRA3,EGR1,CTSH,WDR61,ANGPT1,LHX1,MAB21L2,MAN1A2,OSR2,MCOLN2,PAX5,PEX5,GRIN2B,NME1,NRG3,PPP3CB,OVOL2,PDGFC,EPAS1,KCNMA1,RAB1…
0.00115	1058	1100	75	GO:0044765	BP	single-organism transport	PTH,ATP2B2,ATP6V1C2,ATP6V1C1,SLC25A32,RIMS2,FLVCR2,KPNA5,SLC20A2,CD274,TUFT1,KIF1B,COG5,NODAL,SLC25A48,HIAT1,S35A3_CANFA,ERGIC1,CHUK,PKD2L1,SLC25A30,ARV1,PDE2A,HRH2_CANFA,IFNG,JPH3,ARRB1,SMO,HTR2A,CD63,CDK2,RYR2,MAGI2,UNC93A,REEP2,HSPA9,SLC25A26,SLC13A4,CLEC4E,PEX5,PPP3CB,SNX5,STIM1,F1PWF9_CANFA,ATP6V1E2,PSEN1,KCNMA1,RAB10,RFX3,PFN2,CANX,ATP1B3,Q5JZR0_CANFA,SH3GL2,SH3GLB1,SLC16A9,SLC22A5,IL5,D0F1…
0.00125	1241	1100	85	GO:0048519	BP	negative regulation of biological process	CSF2,APBB2,PTH,ZFPM2,FZD6,LOC100684449,RPS6KA2,BTRC,TRIM54,IL7R,CD274,CTNNBIP1,EIF4EBP2,NODAL,CTH,LECT2,EHMT1,WNT8B,HIF1AN,MED28,GRK6,FBN2,PDE2A,HR,TMEM176B,GRIN3A,ABHD2,HIPK3,IFNG,INTS7,DTL,CNTFR_CANFA,ARRB1,DUSP10,SMO,TIMP3,HTR2A,CDK2,RNF41,RYR2,VWC2,MAGI2,PPP2R3A,EGR1,BCL2A1,CTSH,WDR61,LHX1,RGS12,OSR2,MED27,MTPN,PEX5,PPP3CB,OMA1,OVOL2,PODN,KCNMA1,RARB,ITM2B,RHOH,RFX3,PFN2,GRK7,RYBP,Q5JZR0_CANF…
0.00129	1444	1100	96	GO:0019438	BP	aromatic compound biosynthetic process	REV1,PAPOLA,APBB2,ARNTL,PTH,ZFPM2,FZD6,RFX6,T,BTRC,RFX4,NR2C2,CTNNBIP1,NMNAT1,NODAL,ZNF7,ZNF517,ZNF250,ZNF34,CTH,POLR3A,EHMT1,HIF1AN,TASP1,ARNT2,DDX41,PDE2A,HR,GTF2F2,EAF1,HIPK3,IFNG,DTL,KAT6B,KLF9,ARRB1,EOMES,SMO,CDK2,VWC2,ZNF354A,MAML2,BRD8,EGR1,MTHFS,WDR61,LHX1,KDM4C,OSR2,MED27,PAX5,MTAP,MTPN,NME1,Q3HTT9_CANFA,OVOL2,RHOG,RRM1,HES4,POLR1E,EPAS1,RANBP3L,RARB,NMNAT3,RFX3,MAML1,ZNF354C,ZNF879,ZNF4…
0.0013	11	1100	5	GO:0021587	BP	cerebellum morphogenesis	ATP2B2,RFX4,SMO,LHX1,GLI1
0.0013	764	1100	58	GO:0051239	BP	regulation of multicellular organismal process	CSF2,PTH,ATP2B2,ZFPM2,FZD6,LOC100684449,IL7R,NR2C2,CD274,CTNNBIP1,NODAL,HIF1AN,FBN2,TMEM176B,GRM5,HRH2_CANFA,IFNG,JPH3,ARRB1,LAMA2,DUSP10,SMO,RNF41,VWC2,PPP2R3A,CTSH,WDR61,LHX1,OSR2,MTPN,CLEC4E,PEX5,GRIN2B,OMA1,OVOL2,EPAS1,KCNMA1,RARB,RBP1,RFX3,PFN2,VEGFC,AMOTL1,GLI1,SIPA1L1,SLC22A5,LOC100855872,IL4,D0F1P5_CANFA,IL1RL1,SPAG9,PKP2,TAC4,EPHA1,TG,SFRP5,GDF5,CHRM3
0.00133	974	1100	70	GO:0048513	BP	organ development	IL3_CANFA,CSF2,PTH,ATP2B2,ZFPM2,FZD6,LOC100684449,T,RPS6KA2,BTRC,DPCD,FBXW4,RFX4,EIF2B4,ZNF513,IL7R,NR2C2,PSAP,CTNNBIP1,NODAL,CHUK,HIF1AN,SEMA4C,FBN2,TMEM176B,GPHN,IFNG,CNTFR_CANFA,SMO,RNF41,MIP,PPP2R3A,EGR1,CTSH,WDR61,LHX1,MAB21L2,MAN1A2,OSR2,MCOLN2,PEX5,GRIN2B,PPP3CB,OVOL2,PDGFC,EPAS1,KCNMA1,RARB,CHRNA9,RHOH,RBP1,RFX3,VEGFC,Q5JZR0_CANFA,GLI1,LOC100855872,IL4,KIF3A,D0F1P5_CANFA,UQCRQ,GNB1,STOX2,…
0.00159	874	1100	64	GO:0023051	BP	regulation of signaling	ABR,IL3_CANFA,CSF2,ALK,ARAP2,PTH,ATP2B2,FZD6,LOC100684449,BTRC,FGD5,PSAP,CTNNBIP1,RASGEF1C,NODAL,CTH,LECT2,CHUK,HIF1AN,SEMA4C,GRK6,FBN2,ARAP1,GRM5,HIPK3,HRH2_CANFA,IFNG,JPH3,ARRB1,DUSP10,SMO,HTR2A,RNF41,CDC42SE2,VWC2,MAGI2,PPP2R3A,EGR1,RASGRF1,RGS12,GRIN2B,SIPA1L2,PPP3CB,OVOL2,RHOG,RHOH,RFX3,PFN2,GRK7,SH3GLB1,GLI1,SIPA1L1,LOC100855872,D0F1P5_CANFA,IL1RL1,SPAG9,DNM1L,FGD4,EPHA1,TG,SFRP5,RGS22,CD27…
0.0016	1087	1100	76	GO:0051252	BP	regulation of RNA metabolic process	APBB2,PTH,ZFPM2,FZD6,RFX6,T,BTRC,RFX4,NR2C2,CTNNBIP1,NODAL,ZNF7,ZNF517,ZNF250,ZNF34,CTH,EHMT1,HIF1AN,TASP1,ARNT2,DDX41,PDE2A,HR,EAF1,IFNG,KAT6B,KLF9,ARRB1,SMO,CDK2,VWC2,ZNF354A,MAML2,EGR1,WDR61,LHX1,KDM4C,OSR2,MED27,PAX5,MTPN,NME1,OVOL2,RHOG,HES4,EPAS1,RARB,RBFOX2,RFX3,MAML1,ZNF354C,ZNF879,ZNF454,RYBP,SCMH1,NFYC,GLI1,LOC100855872,IL5,IL4,SLC30A9,MBTD1,KLF11,NCBP1,TNFSF8,IRF5,SFRP5,USP15,ZNF33A,ZN…
0.00183	96	1100	14	GO:0008083	MF	growth factor activity	IL3_CANFA,CSF2,NODAL,FGF14,GDF11,PDGFC,VEGFC,BMP8B,INHBC,INHBE,IL5,IL4,D0F1P5_CANFA,GDF5
0.00187	1816	1100	115	GO:0034645	BP	cellular macromolecule biosynthetic process	IL3_CANFA,CSF2,REV1,PAPOLA,APBB2,ARNTL,PTH,ZFPM2,FZD6,RFX6,T,BTRC,RFX4,NR2C2,CTNNBIP1,EIF4EBP2,NODAL,ZNF7,ZNF517,ZNF250,RPL8,ZNF34,CTH,RPSA,POLR3A,EHMT1,HIF1AN,TASP1,ARNT2,PET112,DDX41,PDE2A,HR,GTF2F2,EAF1,HIPK3,IARS2,IFNG,DTL,KAT6B,KLF9,RS3_CANFA,ARRB1,EOMES,SMO,WIBG,CDK2,ACO1,VWC2,ZNF354A,MAML2,EGR1,WDR61,LHX1,B3GALNT2,KDM4C,OSR2,MCM5,MCM9,MED27,PAX5,LOC609261,MRPS30,MTPN,NME1,Q3HTT9_CANFA,CWH4…
0.00188	879	1100	64	GO:0010646	BP	regulation of cell communication	ABR,IL3_CANFA,CSF2,ALK,ARAP2,PTH,ATP2B2,FZD6,LOC100684449,BTRC,FGD5,PSAP,CTNNBIP1,RASGEF1C,NODAL,CTH,LECT2,CHUK,HIF1AN,SEMA4C,GRK6,FBN2,ARAP1,GRM5,HIPK3,HRH2_CANFA,IFNG,JPH3,ARRB1,DUSP10,SMO,HTR2A,RNF41,CDC42SE2,VWC2,MAGI2,PPP2R3A,EGR1,RASGRF1,RGS12,GRIN2B,SIPA1L2,PPP3CB,OVOL2,RHOG,RHOH,RFX3,PFN2,GRK7,SH3GLB1,GLI1,SIPA1L1,LOC100855872,D0F1P5_CANFA,IL1RL1,SPAG9,DNM1L,FGD4,EPHA1,TG,SFRP5,RGS22,CD27…
0.0019	1057	1100	74	GO:0006355	BP	regulation of transcription, DNA-dependent	APBB2,PTH,ZFPM2,FZD6,RFX6,T,BTRC,RFX4,NR2C2,CTNNBIP1,NODAL,ZNF7,ZNF517,ZNF250,ZNF34,CTH,EHMT1,HIF1AN,TASP1,ARNT2,DDX41,PDE2A,HR,EAF1,IFNG,KAT6B,KLF9,ARRB1,SMO,CDK2,VWC2,ZNF354A,MAML2,EGR1,WDR61,LHX1,KDM4C,OSR2,MED27,PAX5,MTPN,NME1,OVOL2,RHOG,HES4,EPAS1,RARB,RFX3,MAML1,ZNF354C,ZNF879,ZNF454,RYBP,SCMH1,NFYC,GLI1,LOC100855872,IL5,IL4,SLC30A9,MBTD1,KLF11,TNFSF8,IRF5,SFRP5,USP15,ZNF33A,ZNF37A,CHD4,ZNF…
0.00205	395	1100	35	GO:0009790	BP	embryo development	IL3_CANFA,CSF2,ATP2B2,ZFPM2,FZD6,LOC100684449,T,FBXW4,NR2C2,NODAL,EHMT1,ARNT2,SEMA4C,FBN2,GRHL2,LAMA2,SMO,PPP2R3A,LHX1,MAB21L2,OSR2,GRIN2B,NRG3,OVOL2,EPAS1,RARB,CHRNA9,VEGFC,GLI1,KIF3A,STOX2,SFRP5,GDF5,LOC607701,WDR19
0.00208	2263	1100	138	GO:0044249	BP	cellular biosynthetic process	ACACA,IL3_CANFA,CSF2,REV1,PAPOLA,APBB2,ARNTL,PTH,AZIN1,ZFPM2,FZD6,RFX6,T,BTRC,RFX4,CAD,NR2C2,CTNNBIP1,NMNAT1,EIF4EBP2,NODAL,ZNF7,ZNF517,ZNF250,RPL8,ZNF34,CTH,RPSA,DBT,POLR3A,EHMT1,SCD,HIF1AN,TASP1,ARNT2,PET112,DDX41,PDE2A,HR,GPHN,GTF2F2,EAF1,HIPK3,IARS2,IFNG,DTL,KAT6B,KLF9,RS3_CANFA,ARRB1,EOMES,SMO,HTR2A,WIBG,CDK2,ACO1,VWC2,ZNF354A,MAML2,BRD8,EGR1,MTHFS,WDR61,LHX1,B3GALNT2,KDM4C,OSR2,MCM5,MCM9,ME…
0.00209	1426	1100	94	GO:0016740	MF	transferase activity	REV1,LIPT1,AK7,PAPOLA,ALK,LOC612537,RPS6KA2,POLL,CAD,SPEF2,PNPT1,NMNAT1,GFPT2,MAPK9,AGXT2L2,DBT,CCDC76,POLR3A,DNMT3A,Q6QT04_CANFA,EHMT1,CHUK,GRK6,HIPK3,HS2ST1,TARBP1,KIAA1804,PARP12,KAT6B,COMTD1,PRKACB,DCLK3,METTL7B,LOC100855691,CDK2,ERBB3,Q0QEK9_CANFA,CAMKMT,MTR,LRRK1,BRD8,NDST2,CAMK2G,B3GALNT2,LRRK2,MAP4K3,STK3,MELK,MGAT4A,MTAP,NANS,NEK10,NEK11,NME1,NTPCR,PARP11,PRMT8,CHST10,PIP5K1B,PIGH,SCP2,L…
0.00213	349	1100	32	GO:0051049	BP	regulation of transport	RAB4A,PTH,ATP2B2,SLC30A3,CD274,NODAL,PDE2A,IFNG,JPH3,ARRB1,SMO,HTR2A,CD63,RAB5B,MAGI2,CLEC4E,PPP3CB,STIM1,RFX3,PFN2,Q5JZR0_CANFA,SH3GL2,SH3GLB1,IL5,D0F1P5_CANFA,IL1RL1,DNM1L,TAC4,TRDN,SFRP5,UHMK1,CHRM3
0.00217	26	1100	7	GO:0007368	BP	determination of left/right symmetry	T,DPCD,NODAL,SMO,OVOL2,RFX3,KIF3A
0.00219	1225	1100	83	GO:0006351	BP	transcription, DNA-dependent	PAPOLA,APBB2,ARNTL,PTH,ZFPM2,FZD6,RFX6,T,BTRC,RFX4,NR2C2,CTNNBIP1,NODAL,ZNF7,ZNF517,ZNF250,ZNF34,CTH,POLR3A,EHMT1,HIF1AN,TASP1,ARNT2,DDX41,PDE2A,HR,GTF2F2,EAF1,HIPK3,IFNG,KAT6B,KLF9,ARRB1,EOMES,SMO,CDK2,VWC2,ZNF354A,MAML2,EGR1,WDR61,LHX1,KDM4C,OSR2,MED27,PAX5,MTPN,NME1,Q3HTT9_CANFA,OVOL2,RHOG,HES4,POLR1E,EPAS1,RARB,RFX3,MAML1,ZNF354C,ZNF879,ZNF454,RYBP,SCMH1,NFYC,GLI1,LOC100855872,IL5,IL4,SLC30A9…
0.00227	1063	1100	74	GO:2001141	BP	regulation of RNA biosynthetic process	APBB2,PTH,ZFPM2,FZD6,RFX6,T,BTRC,RFX4,NR2C2,CTNNBIP1,NODAL,ZNF7,ZNF517,ZNF250,ZNF34,CTH,EHMT1,HIF1AN,TASP1,ARNT2,DDX41,PDE2A,HR,EAF1,IFNG,KAT6B,KLF9,ARRB1,SMO,CDK2,VWC2,ZNF354A,MAML2,EGR1,WDR61,LHX1,KDM4C,OSR2,MED27,PAX5,MTPN,NME1,OVOL2,RHOG,HES4,EPAS1,RARB,RFX3,MAML1,ZNF354C,ZNF879,ZNF454,RYBP,SCMH1,NFYC,GLI1,LOC100855872,IL5,IL4,SLC30A9,MBTD1,KLF11,TNFSF8,IRF5,SFRP5,USP15,ZNF33A,ZNF37A,CHD4,ZNF…
0.00247	2369	1100	143	GO:0009058	BP	biosynthetic process	ACACA,IL3_CANFA,CSF2,REV1,PAPOLA,APBB2,ARNTL,PTH,AZIN1,ZFPM2,FZD6,RFX6,T,BTRC,RFX4,CAD,NR2C2,CTNNBIP1,NMNAT1,GFPT2,EIF4EBP2,NODAL,ZNF7,ZNF517,ZNF250,RPL8,ZNF34,CTH,ANKRD13C,RPSA,DBT,POLR3A,EHMT1,SCD,HIF1AN,TASP1,ARNT2,PET112,DDX41,PDE2A,HR,GPHN,GTF2F2,EAF1,HIPK3,IARS2,IFNG,DTL,KAT6B,KLF9,RS3_CANFA,ARRB1,EOMES,SMO,HTR2A,WIBG,CDK2,ACO1,VWC2,ZNF354A,MAML2,BRD8,EGR1,MTHFS,WDR61,LHX1,B3GALNT2,KDM4C,OS…
0.00248	35	1100	8	GO:0014020	BP	primary neural tube formation	FZD6,LOC100684449,T,NODAL,SEMA4C,GRHL2,OVOL2,SFRP5
0.00264	1232	1100	83	GO:0032774	BP	RNA biosynthetic process	PAPOLA,APBB2,ARNTL,PTH,ZFPM2,FZD6,RFX6,T,BTRC,RFX4,NR2C2,CTNNBIP1,NODAL,ZNF7,ZNF517,ZNF250,ZNF34,CTH,POLR3A,EHMT1,HIF1AN,TASP1,ARNT2,DDX41,PDE2A,HR,GTF2F2,EAF1,HIPK3,IFNG,KAT6B,KLF9,ARRB1,EOMES,SMO,CDK2,VWC2,ZNF354A,MAML2,EGR1,WDR61,LHX1,KDM4C,OSR2,MED27,PAX5,MTPN,NME1,Q3HTT9_CANFA,OVOL2,RHOG,HES4,POLR1E,EPAS1,RARB,RFX3,MAML1,ZNF354C,ZNF879,ZNF454,RYBP,SCMH1,NFYC,GLI1,LOC100855872,IL5,IL4,SLC30A9…
0.00303	1857	1100	116	GO:0009059	BP	macromolecule biosynthetic process	IL3_CANFA,CSF2,REV1,PAPOLA,APBB2,ARNTL,PTH,ZFPM2,FZD6,RFX6,T,BTRC,RFX4,NR2C2,CTNNBIP1,EIF4EBP2,NODAL,ZNF7,ZNF517,ZNF250,RPL8,ZNF34,CTH,ANKRD13C,RPSA,POLR3A,EHMT1,HIF1AN,TASP1,ARNT2,PET112,DDX41,PDE2A,HR,GTF2F2,EAF1,HIPK3,IARS2,IFNG,DTL,KAT6B,KLF9,RS3_CANFA,ARRB1,EOMES,SMO,WIBG,CDK2,ACO1,VWC2,ZNF354A,MAML2,EGR1,WDR61,LHX1,B3GALNT2,KDM4C,OSR2,MCM5,MCM9,MED27,PAX5,LOC609261,MRPS30,MTPN,NME1,Q3HTT9_C…
0.00308	1973	1100	122	GO:0036094	MF	small molecule binding	ACACA,RAB4A,EIF5B,AK7,ALK,RAP1B,ATP2B2,RPS6KA2,PDE10A,CAD,SPEF2,LOC100856524,KIF1B,MAPK9,AIFM2,SAR1A,CNGA1,CREG2,RBM25,POLR3A,Q6QT04_CANFA,CHUK,PET112,GRK6,DDX41,PDE2A,GNAQ,GNA14,GTF2F2,HACL1,HIPK3,IARS2,KIAA1804,KIF16B,KIF24,ATAD2B,PRKACB,DCLK3,CDK2,RAB5B,ERBB3,RBMS2,DDX58,MTR,LRRK1,BRD8,KIF20A,HSPA9,MTHFS,IDH3A,DNAJA4,CAMK2G,LOC610488,LRRK2,MAP4K3,STK3,MCM5,MCM9,MELK,MRAS,MSH2,NEK10,NEK11,NLRP1…
0.00334	421	1100	36	GO:0042127	BP	regulation of cell proliferation	IL3_CANFA,CSF2,LOC100684449,T,RPS6KA2,FBXW4,CD274,CTNNBIP1,NODAL,IFNG,CNTFR_CANFA,SMO,CDK2,RNF41,CTSH,LHX1,KDM4C,MAB21L2,OSR2,OVOL2,PDGFC,PODN,RARB,VEGFC,FGFR1OP,GLI1,LOC100855872,IL4,D0F1P5_CANFA,FGFR1,KLF11,EPHA1,SFRP5,GDF5,LOC607701,CIB1
0.00335	13	1100	5	GO:0021575	BP	hindbrain morphogenesis	ATP2B2,RFX4,SMO,LHX1,GLI1
0.0034	180	1100	20	GO:0097458	CC	neuron part	ATP2B2,FZD6,SLC30A3,CNGA1,PDE2A,GRIN3A,GRM5,HTR2A,MTPN,PSEN1,KCNMA1,PFN2,Q5JZR0_CANFA,DCTN2,KIF5A,EXOC4,GNB1,PI4K2A,ZFYVE27,UHMK1
0.00378	691	1100	52	GO:1901564	BP	organonitrogen compound metabolic process	LYG1,LYG2,ARAP2,PTH,ATP2B2,AZIN1,CAD,PSAP,NMNAT1,PET112,PION,ARAP1,PDE2A,GDA,ABP1,GNAQ,GPHN,HRH2_CANFA,IARS2,RAB3GAP2,MACROD1,GLS2,MTR,BRD8,FAH,MTHFS,CTSH,LOC482436,MTAP,SPCS2_CANFA,NME1,P4HA1,RHOG,ARG2,EPAS1,AGXT2,PSEN1,RANBP3L,NMNAT3,CTPS,SHMT2,MARS,SIPA1L1,SLC16A9,NADK,SNX18,YARS2,EPHA1,TG,LOC100685007,ADSL,LOC100855962
0.00434	492	1100	40	GO:0010557	BP	positive regulation of macromolecule biosynthetic process	IL3_CANFA,CSF2,PTH,ZFPM2,T,BTRC,RFX4,NR2C2,NODAL,TASP1,ARNT2,DDX41,IFNG,ARRB1,SMO,WIBG,CDK2,MAML2,EGR1,WDR61,LHX1,OSR2,MTPN,NME1,OVOL2,PDGFC,RHOG,RARB,RFX3,MAML1,NFYC,GLI1,LOC100855872,IL5,IL4,SLC30A9,TNFSF8,IRF5,UHMK1,ZNF462
0.00442	476	1100	39	GO:0010628	BP	positive regulation of gene expression	CSF2,PTH,ZFPM2,T,RPS6KA2,BTRC,RFX4,IL7R,NR2C2,NODAL,WNT8B,TASP1,ARNT2,DDX41,IFNG,ARRB1,SMO,CDK2,MAML2,EGR1,CTSH,WDR61,LHX1,OSR2,NME1,OVOL2,RHOG,RARB,RFX3,MAML1,NFYC,GLI1,LOC100855872,IL5,IL4,SLC30A9,TNFSF8,IRF5,ZNF462
0.00443	241	1100	24	GO:0008284	BP	positive regulation of cell proliferation	IL3_CANFA,CSF2,LOC100684449,T,FBXW4,NODAL,IFNG,CNTFR_CANFA,SMO,CDK2,CTSH,LHX1,KDM4C,MAB21L2,OSR2,PDGFC,VEGFC,FGFR1OP,GLI1,IL4,D0F1P5_CANFA,FGFR1,EPHA1,LOC607701
0.00548	531	1100	42	GO:0007399	BP	nervous system development	ALK,APBB2,ATP2B2,FZD6,LOC100684449,T,DPCD,RFX4,EIF2B4,NR2C2,NODAL,MOBP,WNT8B,ARNT2,SEMA4C,MPP5,GRHL2,GRIN3A,IFNG,SMO,VWC2,PPP2R3A,GFRA3,LHX1,MCOLN2,PEX5,NME1,OVOL2,KCNMA1,RAB10,RARB,Q5JZR0_CANFA,GLI1,SIPA1L1,KIF3A,UQCRQ,SPAG9,TG,ZFYVE27,SFRP5,UHMK1,WDR19
0.00554	39	1100	8	GO:0001841	BP	neural tube formation	FZD6,LOC100684449,T,NODAL,SEMA4C,GRHL2,OVOL2,SFRP5
0.0057	532	1100	42	GO:0009891	BP	positive regulation of biosynthetic process	IL3_CANFA,CSF2,PTH,ZFPM2,T,BTRC,RFX4,NR2C2,NODAL,TASP1,ARNT2,DDX41,IFNG,ARRB1,SMO,HTR2A,WIBG,CDK2,MAML2,EGR1,WDR61,LHX1,OSR2,MTPN,NME1,OVOL2,PDGFC,RHOG,AGXT2,RARB,RFX3,MAML1,NFYC,GLI1,LOC100855872,IL5,IL4,SLC30A9,TNFSF8,IRF5,UHMK1,ZNF462
0.00575	30	1100	7	GO:0009855	BP	determination of bilateral symmetry	T,DPCD,NODAL,SMO,OVOL2,RFX3,KIF3A
0.00591	86	1100	12	KEGG:04972	ke	Pancreatic secretion	RAP1B,ATP2B2,GNAQ,RYR2,PLA2G12B,KCNMA1,ATP1B3,LOC479964,CLCA4,CLCA1,CLCA2,CHRM3
0.00615	386	1100	33	GO:0050877	BP	neurological system process	ATP2B2,RIMS2,RPS6KA2,EIF2B4,KIF1B,CNTN5,PRKAR2B,CNGA1,MPP5,GRIN3A,GRM5,HRH2_CANFA,IFNG,JPH3,MIP,REEP2,PEX5,GRIN2B,CHST10,EPAS1,KCNMA1,CHRNA9,PFN2,CANX,Q5JZR0_CANFA,SH3GL2,GNB1,TAS2R16,CLCN1_CANFA,TAS2R40,TG,UNC13B,WDR19
0.00714	31	1100	7	GO:0009799	BP	specification of symmetry	T,DPCD,NODAL,SMO,OVOL2,RFX3,KIF3A
0.00726	15	1100	5	GO:0045740	BP	positive regulation of DNA replication	IL3_CANFA,CSF2,CDK2,PDGFC,GLI1
0.00733	33	1100	7	KEGG:00270	ke	Cysteine and methionine metabolism	CTH,AHCYL2,MTR,LOC482436,MTAP,LOC100855962,GOT1
0.00748	168	1100	18	KEGG:04020	ke	Calcium signaling pathway	ATP2B2,VDAC3,E2R8D3_CANFA,Q6QT04_CANFA,GNAQ,GNA14,GRM5,HRH2_CANFA,VDAC2,PRKACB,ERBB3,RYR2,CAMK2G,PPP3CB,STIM1,CALML6,SLC8A3,CHRM3
0.00753	764	1100	55	GO:0009893	BP	positive regulation of metabolic process	IL3_CANFA,CSF2,ALK,PTH,ZFPM2,T,RPS6KA2,BTRC,RFX4,IL7R,NR2C2,NODAL,WNT8B,TASP1,ARNT2,DDX41,IFNG,ARRB1,SMO,HTR2A,WIBG,CDK2,MAGI2,PPP2R3A,MAML2,EGR1,CTSH,WDR61,LHX1,OSR2,MTPN,NME1,OMA1,OVOL2,PDGFC,RHOG,PRLR,AGXT2,RARB,RFX3,MAML1,NFYC,GLI1,LOC100855872,IL5,RAD50,IL4,ABCD2,SLC30A9,SPAG9,NCBP1,TNFSF8,IRF5,UHMK1,ZNF462
0.00776	136	1100	16	GO:0043005	CC	neuron projection	FZD6,SLC30A3,GRIN3A,GRM5,HTR2A,MTPN,PSEN1,KCNMA1,PFN2,Q5JZR0_CANFA,DCTN2,KIF5A,EXOC4,PI4K2A,ZFYVE27,UHMK1
0.00794	41	1100	8	GO:0030902	BP	hindbrain development	ATP2B2,RFX4,NR2C2,SEMA4C,SMO,LHX1,GLI1,UQCRQ
0.00816	1886	1100	115	GO:1901265	MF	nucleoside phosphate binding	ACACA,RAB4A,EIF5B,AK7,ALK,RAP1B,ATP2B2,RPS6KA2,PDE10A,CAD,SPEF2,LOC100856524,KIF1B,MAPK9,AIFM2,SAR1A,CNGA1,CREG2,RBM25,Q6QT04_CANFA,CHUK,PET112,GRK6,DDX41,PDE2A,GNAQ,GNA14,GTF2F2,HIPK3,IARS2,KIAA1804,KIF16B,KIF24,ATAD2B,PRKACB,DCLK3,CDK2,RAB5B,ERBB3,RBMS2,DDX58,LRRK1,BRD8,KIF20A,HSPA9,MTHFS,IDH3A,DNAJA4,CAMK2G,LOC610488,LRRK2,MAP4K3,STK3,MCM5,MCM9,MELK,MRAS,MSH2,NEK10,NEK11,NLRP14,NME1,NTPCR,SNRP…
0.00816	1886	1100	115	GO:0000166	MF	nucleotide binding	ACACA,RAB4A,EIF5B,AK7,ALK,RAP1B,ATP2B2,RPS6KA2,PDE10A,CAD,SPEF2,LOC100856524,KIF1B,MAPK9,AIFM2,SAR1A,CNGA1,CREG2,RBM25,Q6QT04_CANFA,CHUK,PET112,GRK6,DDX41,PDE2A,GNAQ,GNA14,GTF2F2,HIPK3,IARS2,KIAA1804,KIF16B,KIF24,ATAD2B,PRKACB,DCLK3,CDK2,RAB5B,ERBB3,RBMS2,DDX58,LRRK1,BRD8,KIF20A,HSPA9,MTHFS,IDH3A,DNAJA4,CAMK2G,LOC610488,LRRK2,MAP4K3,STK3,MCM5,MCM9,MELK,MRAS,MSH2,NEK10,NEK11,NLRP14,NME1,NTPCR,SNRP…
0.00834	525	1100	41	GO:0031328	BP	positive regulation of cellular biosynthetic process	IL3_CANFA,CSF2,PTH,ZFPM2,T,BTRC,RFX4,NR2C2,NODAL,TASP1,ARNT2,DDX41,IFNG,ARRB1,SMO,HTR2A,WIBG,CDK2,MAML2,EGR1,WDR61,LHX1,OSR2,NME1,OVOL2,PDGFC,RHOG,AGXT2,RARB,RFX3,MAML1,NFYC,GLI1,LOC100855872,IL5,IL4,SLC30A9,TNFSF8,IRF5,UHMK1,ZNF462
0.00863	459	1100	37	GO:0006259	BP	DNA metabolic process	IL3_CANFA,CSF2,REV1,POLL,H2AFY2,AIFM2,DNMT3A,EHMT1,FANCC,FSHR,IFNG,DTL,KAT6B,SMC5,CDK2,OBFC2B,MCM5,MCM9,ASF1A,MSH2,ORC5,PDGFC,RRM1,RAD51B,POLD3,DEM1,RLF,Q5JZR0_CANFA,MRE11A,GLI1,RAD50,IL4,SMC2,XPA,VRTN,XPC,NCAPD2
0.00926	824	1100	58	GO:0051641	BP	cellular localization	SLC25A32,RIMS2,KPNA5,CD274,TUFT1,KIF1B,GAS8,COG5,SAR1A,NODAL,ANKRD13C,MOBP,ERGIC1,COG3,SLC25A30,PDE2A,MPP5,IFNG,COPG2,ARRB1,SMO,HTR2A,CD63,RYR2,CDC23,REEP2,HSPA9,CLEC4E,PEX5,PPP3CB,RHOG,VTI1B,F1PWF9_CANFA,RAB10,RANBP3L,RFX3,PFN2,CANX,FGFR1OP,Q5JZR0_CANFA,SH3GL2,SH3GLB1,IL5,D0F1P5_CANFA,EXOC4,IL1RL1,SPAG9,DNM1L,NCBP1,TRDN,SFRP5,UHMK1,NPC2,SC61G_CANFA,WDR19,NUP155,CIB1,VPS33B
0.00931	1951	1100	118	GO:0019538	BP	protein metabolic process	ACACA,IL3_CANFA,CSF2,LIPT1,ALK,TTLL5,RPS6KA2,BTRC,ADAMTS12,PPM1G,CAND1,PPIAP4,UBE4B,SAR1A,EIF4EBP2,NODAL,RPL8,CORIN,USP10,CTH,LOC485601,RPSA,C8A,EHMT1,ERLIN1,HIF1AN,PET112,LAP3,PION,CAPN9,GPHN,HIPK3,IARS2,IFNG,DTL,RS3_CANFA,ARRB1,DUSP10,TIMP3,MMP26,MMP19,WIBG,RNF41,PAN2,ACO1,PPM1B,PREPL,TTLL2,PPP2R3A,MSL2,BRD8,CDC23,EGR1,HSPA9,CTSH,ADAMTS7,DNAJA4,WDR61,NDST2,PLAU,B3GALNT2,LOC607841,HGFAC,MAN1A2,M…
0.00943	42	1100	8	GO:0031514	CC	motile cilium	SPEF2,GAS8,CNGA1,TOPORS,PSEN1,KIF5A,TMEM17,WDR19
0.00949	17	1100	5	KEGG:01210	ke	2-Oxocarboxylic acid metabolism	Q0QEK9_CANFA,ACO1,IDH3A,GOT1,IDH2
0.0102	756	1100	54	GO:0005739	CC	mitochondrion	ACACA,LIPT1,SLC25A32,C7ORF10,VDAC3,CCDC90B,PSAP,KIF1B,AIFM2,DBT,NDUFB8,PET112,LAP3,SLC25A30,PDE2A,IARS2,C4H1ORF31,VDAC2,MACROD1,SUOX,SPRYD4,GLS2,LYRM7,ACO1,SLC3A1,LRRK1,BRD8,HSPA9,IDH3A,SLC25A26,MRPS30,PEX5,OCIAD1,P4HA1,NUDT13,OMA1,POLD3,LIPT2,CYB5R2,F1PWF9_CANFA,AGXT2,PSEN1,HADHA,LOC611000,RHOH,NMNAT3,TSPO,MARS,UQCRQ,ABCD2,YARS2,DNM1L,LOC100855721,PI4K2A
0.0108	159	1100	17	KEGG:00230	ke	Purine metabolism	AK7,PDE10A,POLR3A,PDE2A,GDA,NUDT2,BRD8,NME1,NTPCR,RRM1,POLD3,POLR1E,NT5C1A,RRM2,PGM2,ADSL,LOC100688583
0.0121	535	1100	41	GO:0006366	BP	transcription from RNA polymerase II promoter	PAPOLA,PTH,ZFPM2,T,RFX4,NR2C2,CTNNBIP1,NODAL,EHMT1,HIF1AN,ARNT2,DDX41,PDE2A,GTF2F2,IFNG,ARRB1,SMO,VWC2,MAML2,EGR1,WDR61,LHX1,KDM4C,OSR2,MED27,NME1,OVOL2,EPAS1,RARB,RFX3,MAML1,RYBP,GLI1,LOC100855872,IL4,SLC30A9,KLF11,TNFSF8,IRF5,USP15,ZNF462
0.0123	3120	1100	176	GO:0044425	CC	membrane part	MITD1,ALK,ANO2,ATP2B2,ATP6V1C2,ATP6V1C1,P2RY2,FZD6,SLC25A32,FLVCR2,C8H14ORF1,GPRC6A,RXFP3,SLC30A3,MPV17,IL7R,CD274,CDH23,CLSTN1,LOC489647,CNGA1,CX3CR1,CCR8,SLC25A38,SLC25A48,C8B,C8A,HIAT1,S35A3_CANFA,DCHS2,E2R8D3_CANFA,Q6QT04_CANFA,ERLIN1,SCD,NDUFB8,SLC25A30,FREM1,FSHR,TMEM176B,TMEM176A,GNAQ,GPC5,GPR125,GRIA1,GRIN3A,GRM5,GLPA_CANFA,HCN1,HRH2_CANFA,HS2ST1,IFNG,KCNK1,PCNXL2,KCNA5,CNTFR_CANFA,COPG2,…
0.0126	170	1100	18	GO:0048568	BP	embryonic organ development	IL3_CANFA,CSF2,ATP2B2,ZFPM2,FZD6,LOC100684449,T,NODAL,SMO,LHX1,MAB21L2,OSR2,OVOL2,EPAS1,RARB,CHRNA9,GLI1,WDR19
0.0126	502	1100	39	GO:0051173	BP	positive regulation of nitrogen compound metabolic process	IL3_CANFA,CSF2,PTH,ZFPM2,T,BTRC,RFX4,NR2C2,NODAL,TASP1,ARNT2,DDX41,IFNG,ARRB1,SMO,CDK2,MAML2,EGR1,WDR61,LHX1,OSR2,NME1,OVOL2,PDGFC,RHOG,AGXT2,RARB,RFX3,MAML1,NFYC,GLI1,LOC100855872,IL5,IL4,SLC30A9,NCBP1,TNFSF8,IRF5,ZNF462
0.0129	69	1100	10	KEGG:01230	ke	Biosynthesis of amino acids	CTH,Q0QEK9_CANFA,ACO1,MTR,IDH3A,ARG2,SHMT2,GOT1,Q9TV07_CANFA,IDH2
0.013	120	1100	14	KEGG:04728	ke	Dopaminergic synapse	ARNTL,MAPK9,GNAQ,GRIA1,PRKACB,PPP2R3A,PPP2R2C,CAMK2G,GRIN2B,PPP3CB,ATF4,KIF5A,GNB1,CALML6
0.0131	711	1100	51	GO:0010604	BP	positive regulation of macromolecule metabolic process	IL3_CANFA,CSF2,ALK,PTH,ZFPM2,T,RPS6KA2,BTRC,RFX4,IL7R,NR2C2,NODAL,WNT8B,TASP1,ARNT2,DDX41,IFNG,ARRB1,SMO,WIBG,CDK2,MAGI2,PPP2R3A,MAML2,EGR1,CTSH,WDR61,LHX1,OSR2,MTPN,NME1,OVOL2,PDGFC,RHOG,PRLR,RARB,RFX3,MAML1,NFYC,GLI1,LOC100855872,IL5,RAD50,IL4,SLC30A9,SPAG9,NCBP1,TNFSF8,IRF5,UHMK1,ZNF462
0.0133	94	1100	12	KEGG:00240	ke	Pyrimidine metabolism	CAD,POLR3A,NUDT2,BRD8,NME1,RRM1,POLD3,POLR1E,CTPS,NT5C1A,RRM2,LOC100688583
0.0135	171	1100	18	GO:0051050	BP	positive regulation of transport	PTH,ATP2B2,SLC30A3,CD274,NODAL,IFNG,ARRB1,SMO,MAGI2,CLEC4E,PPP3CB,STIM1,Q5JZR0_CANFA,IL5,IL1RL1,DNM1L,TAC4,TRDN
0.015	1134	1100	74	GO:0048523	BP	negative regulation of cellular process	CSF2,APBB2,PTH,ZFPM2,FZD6,LOC100684449,RPS6KA2,BTRC,TRIM54,CD274,CTNNBIP1,EIF4EBP2,NODAL,CTH,LECT2,EHMT1,HIF1AN,MED28,GRK6,FBN2,PDE2A,HR,TMEM176B,ABHD2,HIPK3,IFNG,INTS7,DTL,CNTFR_CANFA,ARRB1,DUSP10,SMO,TIMP3,RNF41,VWC2,MAGI2,PPP2R3A,EGR1,BCL2A1,CTSH,WDR61,LHX1,RGS12,OSR2,MED27,MTPN,OMA1,OVOL2,PODN,RARB,ITM2B,RHOH,RFX3,PFN2,GRK7,RYBP,Q5JZR0_CANFA,SESN3,SH3GLB1,GLI1,LOC100855872,IL4,D0F1P5_CANFA,IL…
0.0156	35	1100	7	GO:0045995	BP	regulation of embryonic development	NR2C2,NODAL,LAMA2,PPP2R3A,LHX1,OSR2,SFRP5
0.0157	263	1100	24	GO:0007267	BP	cell-cell signaling	ATP2B2,RIMS2,KIF1B,NODAL,GRM5,HRH2_CANFA,IFNG,JPH3,ARRB1,SMO,HTR2A,LHX1,GRIN2B,PPP3CB,KCNMA1,RFX3,PFN2,CANX,Q5JZR0_CANFA,SH3GL2,GLI1,D0F1P5_CANFA,PKP2,UNC13B
0.0158	59	1100	9	KEGG:05031	ke	Amphetamine addiction	GRIA1,GRIN3A,PRKACB,CAMK2G,GRIN2B,PPP3CB,ATF4,SIRT1,CALML6
0.0161	96	1100	12	KEGG:05146	ke	Amoebiasis	CSF2,C8B,C8A,GNAQ,GNA14,IFNG,LAMA2,PRKACB,RAB5B,VCL,ARG2,COL24A1
0.0161	1496	1100	93	GO:0032553	MF	ribonucleotide binding	ACACA,RAB4A,EIF5B,AK7,ALK,RAP1B,ATP2B2,RPS6KA2,PDE10A,CAD,SPEF2,KIF1B,MAPK9,SAR1A,CNGA1,CREG2,Q6QT04_CANFA,CHUK,PET112,GRK6,DDX41,PDE2A,GNAQ,GNA14,GTF2F2,HIPK3,IARS2,KIAA1804,KIF16B,KIF24,ATAD2B,PRKACB,DCLK3,CDK2,RAB5B,ERBB3,DDX58,LRRK1,BRD8,KIF20A,HSPA9,MTHFS,DNAJA4,CAMK2G,LRRK2,MAP4K3,STK3,MCM5,MCM9,MELK,MRAS,MSH2,NEK10,NEK11,NLRP14,NME1,NTPCR,EFCAB4B,PCCA,RHOG,RRM1,RAD51B,RIMKLA,PRKCE,RAB10,RA…
0.0165	311	1100	27	GO:0005615	CC	extracellular space	IL3_CANFA,CSF2,PTH,LOC100684449,PSAP,NODAL,WNT8B,ABP1,IFNE,IFNG,CNTFR_CANFA,VWC2,CTSH,HGFAC,PDGFC,PODN,ITM2B,CA6,VEGFC,Q5JZR0_CANFA,SCUBE1,IL5,IL13,IL4,TG,TNFSF15,TNFSF8
0.0167	442	1100	35	GO:0051254	BP	positive regulation of RNA metabolic process	PTH,ZFPM2,T,BTRC,RFX4,NR2C2,NODAL,TASP1,ARNT2,DDX41,IFNG,ARRB1,SMO,CDK2,MAML2,EGR1,WDR61,LHX1,OSR2,NME1,OVOL2,RHOG,RARB,RFX3,MAML1,NFYC,GLI1,LOC100855872,IL5,IL4,SLC30A9,NCBP1,TNFSF8,IRF5,ZNF462
0.0169	160	1100	17	GO:0044463	CC	cell projection part	FZD6,SPEF2,CNGA1,SEMA4C,HTR2A,TOPORS,GRIN2B,PSEN1,KCNMA1,PFN2,DCTN2,KIF5A,SLC22A5,EXOC4,TMEM17,ZFYVE27,UHMK1
0.017	493	1100	38	GO:0045935	BP	positive regulation of nucleobase-containing compound metabolic process	IL3_CANFA,CSF2,PTH,ZFPM2,T,BTRC,RFX4,NR2C2,NODAL,TASP1,ARNT2,DDX41,IFNG,ARRB1,SMO,CDK2,MAML2,EGR1,WDR61,LHX1,OSR2,NME1,OVOL2,PDGFC,RHOG,RARB,RFX3,MAML1,NFYC,GLI1,LOC100855872,IL5,IL4,SLC30A9,NCBP1,TNFSF8,IRF5,ZNF462
0.0183	1483	1100	92	GO:0032555	MF	purine ribonucleotide binding	ACACA,RAB4A,EIF5B,AK7,ALK,RAP1B,ATP2B2,RPS6KA2,PDE10A,CAD,SPEF2,KIF1B,MAPK9,SAR1A,CNGA1,Q6QT04_CANFA,CHUK,PET112,GRK6,DDX41,PDE2A,GNAQ,GNA14,GTF2F2,HIPK3,IARS2,KIAA1804,KIF16B,KIF24,ATAD2B,PRKACB,DCLK3,CDK2,RAB5B,ERBB3,DDX58,LRRK1,BRD8,KIF20A,HSPA9,MTHFS,DNAJA4,CAMK2G,LRRK2,MAP4K3,STK3,MCM5,MCM9,MELK,MRAS,MSH2,NEK10,NEK11,NLRP14,NME1,NTPCR,EFCAB4B,PCCA,RHOG,RRM1,RAD51B,RIMKLA,PRKCE,RAB10,RAB38,IT…
0.0191	1485	1100	92	GO:0017076	MF	purine nucleotide binding	ACACA,RAB4A,EIF5B,AK7,ALK,RAP1B,ATP2B2,RPS6KA2,PDE10A,CAD,SPEF2,KIF1B,MAPK9,SAR1A,CNGA1,Q6QT04_CANFA,CHUK,PET112,GRK6,DDX41,PDE2A,GNAQ,GNA14,GTF2F2,HIPK3,IARS2,KIAA1804,KIF16B,KIF24,ATAD2B,PRKACB,DCLK3,CDK2,RAB5B,ERBB3,DDX58,LRRK1,BRD8,KIF20A,HSPA9,MTHFS,DNAJA4,CAMK2G,LRRK2,MAP4K3,STK3,MCM5,MCM9,MELK,MRAS,MSH2,NEK10,NEK11,NLRP14,NME1,NTPCR,EFCAB4B,PCCA,RHOG,RRM1,RAD51B,RIMKLA,PRKCE,RAB10,RAB38,IT…
0.0193	600	1100	44	GO:0050793	BP	regulation of developmental process	CSF2,PTH,ZFPM2,FZD6,LOC100684449,IL7R,NR2C2,CTNNBIP1,NODAL,HIF1AN,MED28,FBN2,TMEM176B,IFNG,LAMA2,DUSP10,FAM40B,SMO,RNF41,VWC2,PPP2R3A,CTSH,WDR61,LHX1,OSR2,MED27,OMA1,OVOL2,RARB,RBP1,RFX3,VEGFC,GLI1,SIPA1L1,LOC100855872,IL4,D0F1P5_CANFA,SPAG9,PKP2,EPHA1,TG,SFRP5,GDF5,WIF1
0.0195	221	1100	21	GO:0048598	BP	embryonic morphogenesis	ATP2B2,FZD6,LOC100684449,T,FBXW4,NODAL,SEMA4C,FBN2,GRHL2,SMO,LHX1,MAB21L2,OSR2,OVOL2,RARB,CHRNA9,VEGFC,GLI1,SFRP5,GDF5,WDR19
0.0196	463	1100	36	GO:2000026	BP	regulation of multicellular organismal development	PTH,ZFPM2,FZD6,LOC100684449,IL7R,NR2C2,CTNNBIP1,NODAL,HIF1AN,FBN2,TMEM176B,IFNG,LAMA2,SMO,RNF41,VWC2,PPP2R3A,CTSH,WDR61,LHX1,OSR2,OVOL2,RARB,RBP1,RFX3,VEGFC,GLI1,SIPA1L1,LOC100855872,IL4,D0F1P5_CANFA,SPAG9,EPHA1,TG,SFRP5,GDF5
0.0207	27	1100	6	GO:0008013	MF	beta-catenin binding	BTRC,CTNNBIP1,LOC100855658,DLG5,MED12L,PTPRT
0.0213	365	1100	30	GO:0019752	BP	carboxylic acid metabolic process	ACACA,CAD,PRKAR2B,SAR1A,SCD,PET112,ARV1,IARS2,GLS2,ACO1,FAH,MTHFS,ACSBG1,LOC482436,MTAP,PEX5,P4HA1,ARG2,LIPT2,AGXT2,HADHA,RBP1,LTC4S,SHMT2,MARS,ABCD2,YARS2,TG,LOC100855962,IDH2
0.0221	37	1100	7	GO:0072372	CC	primary cilium	CNGA1,SMO,RAB10,KIF3A,GNB1,TMEM17,WDR19
0.0228	1246	1100	79	GO:0044710	BP	single-organism metabolic process	ACACA,ARAP2,PTH,ATP2B2,CAD,PSAP,NMNAT1,PRKAR2B,SAR1A,SCD,NDUFB8,PET112,ARV1,ARAP1,PDE2A,GDA,ABP1,GNAQ,HRH2_CANFA,IARS2,RAB3GAP2,IFNG,MACROD1,DUSP10,AHCYL2,HTR2A,ESD,Q0QEK9_CANFA,GLS2,ACO1,BRD8,FAH,MTHFS,IDH3A,ACSBG1,LOC482436,MTAP,PEX5,NME1,CWH43,PLA2G12B,P4HA1,OMA1,RHOG,RRM1,PLCXD3,ARG2,LIPT2,GDPD1,PPME1,AGXT2,KCNMA1,HADHA,RANBP3L,RBP1,NMNAT3,CA6,LTC4S,CTPS,Q5JZR0_CANFA,NT5C1A,SH3GLB1,SHMT2,MARS…
0.0229	286	1100	25	GO:0016874	MF	ligase activity	ACACA,TTLL5,BTRC,UBE4B,PET112,LOC100684029,HECW1,IARS2,DTL,RNF41,TTLL2,MTHFS,ACSBG1,PCCA,RNF130,RNF7,CTPS,TTLL12,MARS,HERC4,SLC27A6,YARS2,UBE2H,UBR5,TTLL13
0.0236	434	1100	34	GO:0045893	BP	positive regulation of transcription, DNA-dependent	PTH,ZFPM2,T,BTRC,RFX4,NR2C2,NODAL,TASP1,ARNT2,DDX41,IFNG,ARRB1,SMO,CDK2,MAML2,EGR1,WDR61,LHX1,OSR2,NME1,OVOL2,RHOG,RARB,RFX3,MAML1,NFYC,GLI1,LOC100855872,IL5,IL4,SLC30A9,TNFSF8,IRF5,ZNF462
0.0238	48	1100	8	GO:0030178	BP	negative regulation of Wnt receptor signaling pathway	FZD6,LOC100684449,CTNNBIP1,LECT2,PPP2R3A,EGR1,GLI1,SFRP5
0.0247	714	1100	50	GO:0051649	BP	establishment of localization in cell	SLC25A32,RIMS2,KPNA5,CD274,TUFT1,KIF1B,COG5,SAR1A,NODAL,MOBP,ERGIC1,COG3,SLC25A30,PDE2A,IFNG,COPG2,ARRB1,SMO,HTR2A,RYR2,CDC23,REEP2,HSPA9,CLEC4E,PEX5,PPP3CB,VTI1B,F1PWF9_CANFA,RAB10,RANBP3L,RFX3,PFN2,CANX,Q5JZR0_CANFA,SH3GL2,SH3GLB1,IL5,D0F1P5_CANFA,EXOC4,IL1RL1,SPAG9,DNM1L,NCBP1,TRDN,SFRP5,UHMK1,NPC2,SC61G_CANFA,NUP155,VPS33B
0.0253	30	1100	6	KEGG:00250	ke	Alanine, aspartate and glutamate metabolism	CAD,GLS2,LOC482436,AGXT2,ADSL,GOT1
0.0282	507	1100	38	GO:0006357	BP	regulation of transcription from RNA polymerase II promoter	PTH,ZFPM2,T,RFX4,NR2C2,CTNNBIP1,NODAL,EHMT1,HIF1AN,ARNT2,DDX41,PDE2A,IFNG,ARRB1,SMO,VWC2,MAML2,EGR1,WDR61,KDM4C,OSR2,MED27,NME1,OVOL2,EPAS1,RARB,RFX3,MAML1,RYBP,GLI1,LOC100855872,IL4,SLC30A9,KLF11,TNFSF8,IRF5,USP15,ZNF462
0.0299	112	1100	13	GO:0048562	BP	embryonic organ morphogenesis	ATP2B2,FZD6,LOC100684449,T,NODAL,SMO,LHX1,OSR2,OVOL2,RARB,CHRNA9,GLI1,WDR19
0.0304	1702	1100	102	GO:0071840	BP	cellular component organization or biogenesis	ACACA,CSF2,RAB4A,LYG1,LYG2,TSGA10,APBB2,ATP2B2,OXR1,FZD6,LOC100684449,RSPH4A,TRIM54,IL7R,CTNNBIP1,H2AFY2,AIFM2,SAR1A,NODAL,CRISPLD2,CTH,RPSA,SASS6,FAM103A1,PET112,PDE2A,FSHR,GPHN,MPP5,GRIN3A,KAT6B,KCNA5,KIF24,C9ORF24,ARRB1,LIMCH1,FAM40B,SMO,RAB5B,KCNV2,ZPBP,MAGI2,MSL2,BRD8,CDC23,REEP2,WDR61,LHX1,KCNS2,ASF1A,MTPN,PEX5,P4HA1,OMA1,PDGFC,RHOG,RRM1,LOC100856241,EPAS1,PRLR,KCNMA1,RAB10,LOC611000,RFX3,P…
0.0311	20	1100	5	GO:0008144	MF	drug binding	PDE2A,ABP1,SMO,HTR2A,PPP3CB
0.0321	155	1100	16	GO:0034655	BP	nucleobase-containing compound catabolic process	ARAP2,PNPT1,ARAP1,PDE2A,GNAQ,RAB3GAP2,LOC100684639,WIBG,RHOG,SMG8,Q5JZR0_CANFA,NT5C1A,SIPA1L1,SNX18,EPHA1,NCBP1
0.0326	74	1100	10	GO:0046039	BP	GTP metabolic process	ARAP2,ARAP1,GNAQ,RAB3GAP2,BRD8,NME1,RHOG,SIPA1L1,SNX18,EPHA1
0.0327	943	1100	62	GO:0006793	BP	phosphorus metabolic process	ACACA,IL3_CANFA,CSF2,ALK,ARAP2,PTH,ATP2B2,RPS6KA2,BTRC,CAD,PPM1G,NMNAT1,PPA1,NODAL,DBT,NDUFB8,ARAP1,PDE2A,GNAQ,GPHN,HIPK3,HRH2_CANFA,RAB3GAP2,IFNG,ARRB1,DUSP10,HTR2A,PPM1B,MAGI2,BRD8,MELK,NME1,CWH43,PPP3CB,PDGFC,RHOG,RRM1,PPM1E,SMG8,PRLR,RANBP3L,NMNAT3,GRK7,CTPS,NT5C1A,SH3GLB1,SIPA1L1,LOC100855872,IL5,RAD50,IL4,NADK,SNX18,SPAG9,RRM2,EPHA1,LOC100685007,ADSL,PI4K2A,SFRP5,UHMK1,USP15
0.0331	62	1100	9	GO:0010927	BP	cellular component assembly involved in morphogenesis	RSPH4A,KIF24,ZPBP,RFX3,MYPN,KIF3A,TMOD1,TMEM17,WDR19
0.0332	78	1100	10	KEGG:04146	ke	Peroxisome	ACSL6,FAR1,AMACR,MPV17,HACL1,PEX5,SCP2,ABCD2,GSTK1,IDH2
0.0348	890	1100	59	GO:0036211	BP	protein modification process	IL3_CANFA,CSF2,LIPT1,ALK,TTLL5,RPS6KA2,BTRC,PPM1G,CAND1,NODAL,USP10,CTH,EHMT1,HIF1AN,HIPK3,IFNG,DTL,ARRB1,DUSP10,RNF41,PPM1B,TTLL2,MSL2,BRD8,CDC23,EGR1,WDR61,B3GALNT2,MELK,CWH43,P4HA1,PPP3CB,PDGFC,LIPT2,RIMKLA,PPM1E,SMG8,PPME1,GALNT11,PRLR,RNF7,GRK7,MGAT3,RYBP,Q5JZR0_CANFA,TTLL12,LOC100682680,LOC100855872,IL5,RAD50,SPAG9,EPHA1,UBE2H,SFRP5,UHMK1,USP15,IRAK2,Q9TV07_CANFA,TTLL13
0.0348	890	1100	59	GO:0006464	BP	cellular protein modification process	IL3_CANFA,CSF2,LIPT1,ALK,TTLL5,RPS6KA2,BTRC,PPM1G,CAND1,NODAL,USP10,CTH,EHMT1,HIF1AN,HIPK3,IFNG,DTL,ARRB1,DUSP10,RNF41,PPM1B,TTLL2,MSL2,BRD8,CDC23,EGR1,WDR61,B3GALNT2,MELK,CWH43,P4HA1,PPP3CB,PDGFC,LIPT2,RIMKLA,PPM1E,SMG8,PPME1,GALNT11,PRLR,RNF7,GRK7,MGAT3,RYBP,Q5JZR0_CANFA,TTLL12,LOC100682680,LOC100855872,IL5,RAD50,SPAG9,EPHA1,UBE2H,SFRP5,UHMK1,USP15,IRAK2,Q9TV07_CANFA,TTLL13
0.0348	1457	1100	89	GO:0044267	BP	cellular protein metabolic process	IL3_CANFA,CSF2,LIPT1,ALK,TTLL5,RPS6KA2,BTRC,PPM1G,CAND1,PPIAP4,UBE4B,EIF4EBP2,NODAL,RPL8,USP10,CTH,RPSA,EHMT1,ERLIN1,HIF1AN,PET112,GPHN,HIPK3,IARS2,IFNG,DTL,RS3_CANFA,ARRB1,DUSP10,TIMP3,WIBG,RNF41,PAN2,ACO1,PPM1B,TTLL2,MSL2,BRD8,CDC23,EGR1,HSPA9,DNAJA4,WDR61,B3GALNT2,LOC607841,MELK,LOC609261,MRPS30,SPCS2_CANFA,CWH43,P4HA1,PPP3CB,OMA1,PDGFC,LIPT2,PPIH,RIMKLA,PPM1E,SMG8,PPME1,GALNT11,PRLR,PSEN1,CAN…
0.0353	279	1100	24	GO:0055082	BP	cellular chemical homeostasis	PTH,ATP2B2,RIMS2,SLC30A3,EIF2B4,CX3CR1,CCR8,GNAQ,MPP5,IFNG,ARRB1,HTR2A,ACO1,RYR2,GRIN2B,PPP3CB,PSEN1,KCNMA1,CHRNA9,RIMS3,Q5JZR0_CANFA,PKP2,TG,TRDN
0.0357	40	1100	7	GO:0051054	BP	positive regulation of DNA metabolic process	IL3_CANFA,CSF2,IFNG,CDK2,PDGFC,GLI1,IL4
0.036	1478	1100	90	GO:0032549	MF	ribonucleoside binding	ACACA,RAB4A,EIF5B,AK7,ALK,RAP1B,ATP2B2,RPS6KA2,CAD,SPEF2,KIF1B,MAPK9,SAR1A,POLR3A,Q6QT04_CANFA,CHUK,PET112,GRK6,DDX41,GNAQ,GNA14,GTF2F2,HIPK3,IARS2,KIAA1804,KIF16B,KIF24,ATAD2B,PRKACB,DCLK3,CDK2,RAB5B,ERBB3,DDX58,LRRK1,BRD8,KIF20A,HSPA9,MTHFS,DNAJA4,CAMK2G,LRRK2,MAP4K3,STK3,MCM5,MCM9,MELK,MRAS,MSH2,NEK10,NEK11,NLRP14,NME1,NTPCR,EFCAB4B,PCCA,RHOG,RRM1,RAD51B,RIMKLA,PRKCE,RAB10,RAB38,ITM2B,RHOH,GRK…
0.0374	202	1100	19	GO:0035637	BP	multicellular organismal signaling	ATP2B2,RIMS2,EIF2B4,KIF1B,MPP5,GRM5,HRH2_CANFA,IFNG,JPH3,GRIN2B,KCNMA1,PFN2,CANX,Q5JZR0_CANFA,SH3GL2,PKP2,CLCN1_CANFA,TG,UNC13B
0.0384	346	1100	28	GO:0055086	BP	nucleobase-containing small molecule metabolic process	ARAP2,PTH,ATP2B2,CAD,NMNAT1,ARAP1,PDE2A,GDA,GNAQ,HRH2_CANFA,RAB3GAP2,MACROD1,BRD8,MTAP,NME1,RHOG,RRM1,RANBP3L,NMNAT3,CTPS,NT5C1A,SIPA1L1,NADK,SNX18,RRM2,EPHA1,LOC100685007,ADSL
0.0389	1482	1100	90	GO:0001882	MF	nucleoside binding	ACACA,RAB4A,EIF5B,AK7,ALK,RAP1B,ATP2B2,RPS6KA2,CAD,SPEF2,KIF1B,MAPK9,SAR1A,POLR3A,Q6QT04_CANFA,CHUK,PET112,GRK6,DDX41,GNAQ,GNA14,GTF2F2,HIPK3,IARS2,KIAA1804,KIF16B,KIF24,ATAD2B,PRKACB,DCLK3,CDK2,RAB5B,ERBB3,DDX58,LRRK1,BRD8,KIF20A,HSPA9,MTHFS,DNAJA4,CAMK2G,LRRK2,MAP4K3,STK3,MCM5,MCM9,MELK,MRAS,MSH2,NEK10,NEK11,NLRP14,NME1,NTPCR,EFCAB4B,PCCA,RHOG,RRM1,RAD51B,RIMKLA,PRKCE,RAB10,RAB38,ITM2B,RHOH,GRK…
0.0392	158	1100	16	GO:0044057	BP	regulation of system process	ATP2B2,GRM5,HRH2_CANFA,IFNG,JPH3,MTPN,GRIN2B,EPAS1,KCNMA1,PFN2,SLC22A5,D0F1P5_CANFA,PKP2,TAC4,TG,CHRM3
0.0393	21	1100	5	GO:0022600	BP	digestive system process	HRH2_CANFA,ACO1,KCNMA1,SLC22A5,TAC4
0.0405	52	1100	8	GO:0009108	BP	coenzyme biosynthetic process	NMNAT1,DBT,GPHN,MTHFS,LIPT2,RANBP3L,NMNAT3,NADK
0.0414	398	1100	31	GO:0006082	BP	organic acid metabolic process	ACACA,CAD,PRKAR2B,SAR1A,SCD,PET112,ARV1,IARS2,GLS2,ACO1,FAH,MTHFS,ACSBG1,LOC482436,MTAP,PEX5,P4HA1,ARG2,LIPT2,AGXT2,HADHA,RBP1,LTC4S,SHMT2,MARS,SLC16A9,ABCD2,YARS2,TG,LOC100855962,IDH2
0.0416	1641	1100	98	GO:0016043	BP	cellular component organization	ACACA,CSF2,RAB4A,TSGA10,APBB2,ATP2B2,FZD6,LOC100684449,RSPH4A,TRIM54,IL7R,CTNNBIP1,H2AFY2,AIFM2,SAR1A,NODAL,CRISPLD2,CTH,RPSA,SASS6,FAM103A1,PET112,PDE2A,FSHR,GPHN,MPP5,GRIN3A,KAT6B,KCNA5,KIF24,C9ORF24,ARRB1,LIMCH1,FAM40B,SMO,RAB5B,KCNV2,ZPBP,MAGI2,MSL2,BRD8,CDC23,REEP2,WDR61,LHX1,KCNS2,ASF1A,MTPN,PEX5,P4HA1,OMA1,PDGFC,RHOG,RRM1,LOC100856241,EPAS1,PRLR,KCNMA1,RAB10,LOC611000,RFX3,PFN2,FGFR1OP,RYB…
0.0418	159	1100	16	GO:0005578	CC	proteinaceous extracellular matrix	ADAMTSL3,C1QTNF3,ADAMTS12,WNT8B,FBN2,GPC5,IL26,LAMA2,TIMP3,VWC2,ADAMTS7,ADAMTS2,COL24A1,SMOC1,SPOCK1,HPSE2
0.0435	316	1100	26	GO:0045944	BP	positive regulation of transcription from RNA polymerase II promoter	PTH,ZFPM2,T,RFX4,NR2C2,NODAL,ARNT2,DDX41,IFNG,ARRB1,SMO,MAML2,EGR1,WDR61,OSR2,NME1,RARB,RFX3,MAML1,GLI1,LOC100855872,IL4,SLC30A9,TNFSF8,IRF5,ZNF462
0.0435	936	1100	61	GO:0043412	BP	macromolecule modification	IL3_CANFA,CSF2,LIPT1,ALK,TTLL5,RPS6KA2,BTRC,PPM1G,CAND1,NODAL,USP10,CTH,DNMT3A,EFCAB10,EHMT1,HIF1AN,HIPK3,IFNG,DTL,ARRB1,DUSP10,RNF41,PPM1B,TTLL2,MSL2,BRD8,CDC23,EGR1,WDR61,B3GALNT2,MELK,CWH43,P4HA1,PPP3CB,PDGFC,LIPT2,RIMKLA,PPM1E,SMG8,PPME1,GALNT11,PRLR,RNF7,GRK7,MGAT3,RYBP,Q5JZR0_CANFA,TTLL12,LOC100682680,LOC100855872,IL5,RAD50,SPAG9,EPHA1,UBE2H,SFRP5,UHMK1,USP15,IRAK2,Q9TV07_CANFA,TTLL13
0.0441	31	1100	6	GO:0060606	BP	tube closure	FZD6,LOC100684449,T,SEMA4C,GRHL2,SFRP5
0.0441	31	1100	6	GO:0001843	BP	neural tube closure	FZD6,LOC100684449,T,SEMA4C,GRHL2,SFRP5
0.0445	993	1100	64	GO:0048583	BP	regulation of response to stimulus	ABR,IL3_CANFA,CSF2,ALK,ARAP2,PTH,FZD6,LOC100684449,BTRC,IL7R,FGD5,NR2C2,PSAP,CTNNBIP1,RASGEF1C,NODAL,CTH,LECT2,C8A,CHUK,HIF1AN,SEMA4C,GRK6,FBN2,ARAP1,PDE2A,GRIN3A,HIPK3,IFNG,ARRB1,DUSP10,SMO,HTR2A,RNF41,CDC42SE2,VWC2,MAGI2,PPP2R3A,EGR1,RASGRF1,CTSH,RGS12,MTPN,SIPA1L2,PPP3CB,OVOL2,RHOG,RHOH,GRK7,VEGFC,SH3GLB1,GLI1,SIPA1L1,LOC100855872,IL4,IL1RL1,SPAG9,DNM1L,FGD4,EPHA1,SFRP5,RGS22,CD27,CIB1
0.0449	1470	1100	89	GO:0035639	MF	purine ribonucleoside triphosphate binding	ACACA,RAB4A,EIF5B,AK7,ALK,RAP1B,ATP2B2,RPS6KA2,CAD,SPEF2,KIF1B,MAPK9,SAR1A,Q6QT04_CANFA,CHUK,PET112,GRK6,DDX41,GNAQ,GNA14,GTF2F2,HIPK3,IARS2,KIAA1804,KIF16B,KIF24,ATAD2B,PRKACB,DCLK3,CDK2,RAB5B,ERBB3,DDX58,LRRK1,BRD8,KIF20A,HSPA9,MTHFS,DNAJA4,CAMK2G,LRRK2,MAP4K3,STK3,MCM5,MCM9,MELK,MRAS,MSH2,NEK10,NEK11,NLRP14,NME1,NTPCR,EFCAB4B,PCCA,RHOG,RRM1,RAD51B,RIMKLA,PRKCE,RAB10,RAB38,ITM2B,RHOH,GRK7,SLFNL…
0.0459	53	1100	8	GO:0001838	BP	embryonic epithelial tube formation	FZD6,LOC100684449,T,NODAL,SEMA4C,GRHL2,OVOL2,SFRP5
0.0467	285	1100	24	GO:0031410	CC	cytoplasmic vesicle	SLC30A3,SNX17,KIF1B,CRISPLD2,SEMA4C,COPG2,ARRB1,RAB5B,ZPBP,CTSH,TBC1D2,NECAP1,GRIN2B,ATP6V1E2,RAB10,ITM2B,CANX,Q5JZR0_CANFA,AMOTL1,CLCA1,SNX18,SYNPR,SYT10,VPS33B
0.0475	191	1100	18	GO:0019226	BP	transmission of nerve impulse	ATP2B2,RIMS2,EIF2B4,KIF1B,MPP5,GRM5,HRH2_CANFA,IFNG,JPH3,GRIN2B,KCNMA1,PFN2,CANX,Q5JZR0_CANFA,SH3GL2,CLCN1_CANFA,TG,UNC13B
0.0484	1474	1100	89	GO:0032550	MF	purine ribonucleoside binding	ACACA,RAB4A,EIF5B,AK7,ALK,RAP1B,ATP2B2,RPS6KA2,CAD,SPEF2,KIF1B,MAPK9,SAR1A,Q6QT04_CANFA,CHUK,PET112,GRK6,DDX41,GNAQ,GNA14,GTF2F2,HIPK3,IARS2,KIAA1804,KIF16B,KIF24,ATAD2B,PRKACB,DCLK3,CDK2,RAB5B,ERBB3,DDX58,LRRK1,BRD8,KIF20A,HSPA9,MTHFS,DNAJA4,CAMK2G,LRRK2,MAP4K3,STK3,MCM5,MCM9,MELK,MRAS,MSH2,NEK10,NEK11,NLRP14,NME1,NTPCR,EFCAB4B,PCCA,RHOG,RRM1,RAD51B,RIMKLA,PRKCE,RAB10,RAB38,ITM2B,RHOH,GRK7,SLFNL…
0.0491	22	1100	5	GO:0001608	MF	G-protein coupled nucleotide receptor activity	P2RY2,GPR87,P2RY13,P2RY12,LPAR5
0.0491	22	1100	5	GO:0045028	MF	G-protein coupled purinergic nucleotide receptor activity	P2RY2,GPR87,P2RY13,P2RY12,LPAR5
0.0494	1475	1100	89	GO:0001883	MF	purine nucleoside binding	ACACA,RAB4A,EIF5B,AK7,ALK,RAP1B,ATP2B2,RPS6KA2,CAD,SPEF2,KIF1B,MAPK9,SAR1A,Q6QT04_CANFA,CHUK,PET112,GRK6,DDX41,GNAQ,GNA14,GTF2F2,HIPK3,IARS2,KIAA1804,KIF16B,KIF24,ATAD2B,PRKACB,DCLK3,CDK2,RAB5B,ERBB3,DDX58,LRRK1,BRD8,KIF20A,HSPA9,MTHFS,DNAJA4,CAMK2G,LRRK2,MAP4K3,STK3,MCM5,MCM9,MELK,MRAS,MSH2,NEK10,NEK11,NLRP14,NME1,NTPCR,EFCAB4B,PCCA,RHOG,RRM1,RAD51B,RIMKLA,PRKCE,RAB10,RAB38,ITM2B,RHOH,GRK7,SLFNL…
0.0497	369	1100	29	GO:0048878	BP	chemical homeostasis	ACACA,PTH,ATP2B2,RIMS2,SLC30A3,EIF2B4,CX3CR1,CCR8,GNAQ,MPP5,IFNG,ARRB1,HTR2A,ACO1,RYR2,CTSH,GRIN2B,PPP3CB,EPAS1,PSEN1,KCNMA1,CHRNA9,RIMS3,Q5JZR0_CANFA,SLC9A2,PKP2,TG,TRDN,NPC2
0.05	57	1100	8	KEGG:05321	ke	Inflammatory bowel disease	IFNG,IL22,IL23A,IL5,IL13,IL4,IL18RAP,IL18R1
0.05	1495	1100	102	HP:0000007	hp	Autosomal recessive inheritance	ACACA,FZD6,FLVCR2,RSPH4A,RFX6,C10ORF11,AMACR,Q2PUG5_CANFA,MPV17,EIF2B4,ZNF513,IL7R,PNPT1,TRH,CDH23,PSAP,NMNAT1,CNTN1,COG5,NODAL,CNGA1,CTH,SLC25A38,C8B,C8A,DBT,POLR3A,DOCK8,Q6QT04_CANFA,CHUK,CNNM4,FANCC,FREM1,FSHR,HR,GPHN,RAB3GAP2,TBXAS1,KAT6B,DNAI1,LAMA2,TMEM5,ITGA7,SUOX,ERBB3,VLDLR,KCNV2,SLC3A1,MTR,FAH,B3GALNT2,TBCE,LRBA,DOK7,VPS13B,P2RY12,COA5,MSH2,PEX5,LOC100855673,PCCA,PGAP2,STIM1,RDH12,ZFYVE…
